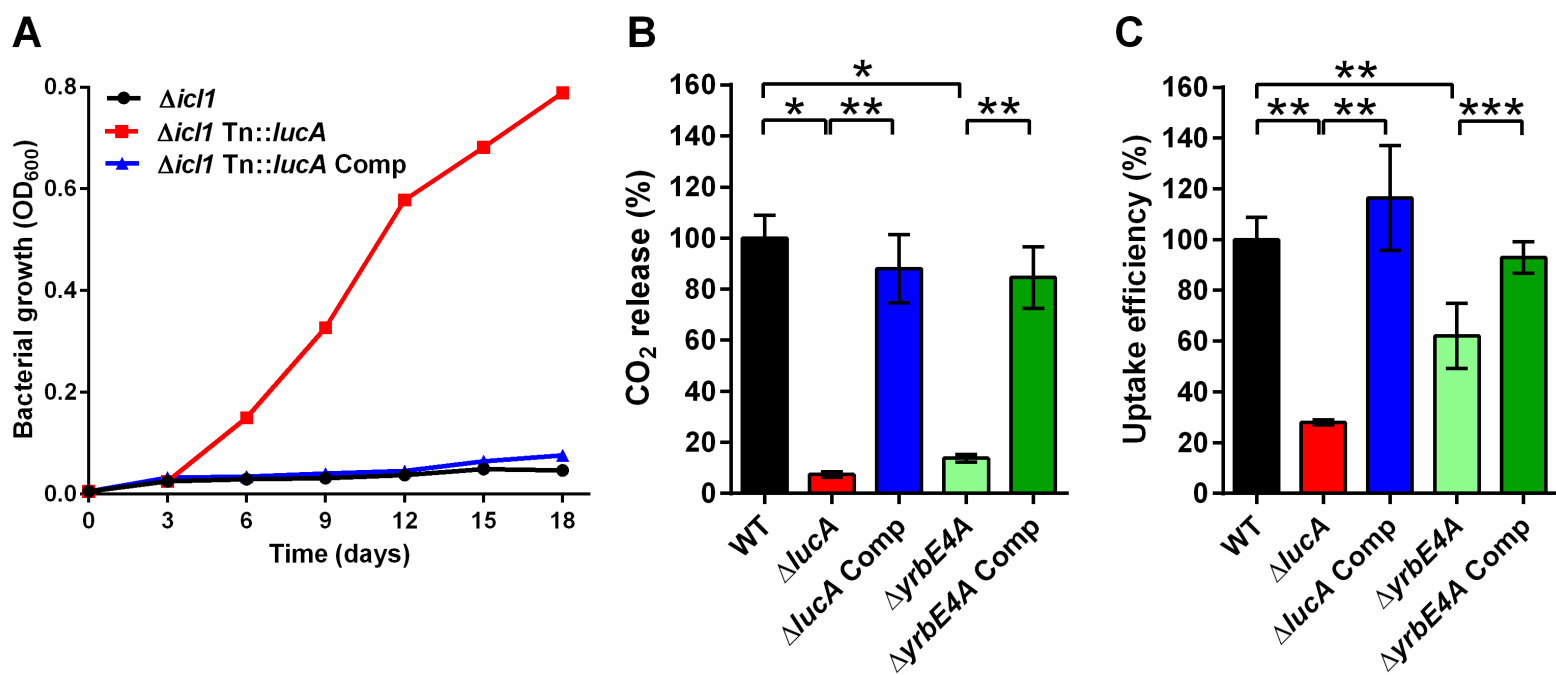

## Fatty acids

### Fatty acid induced genes

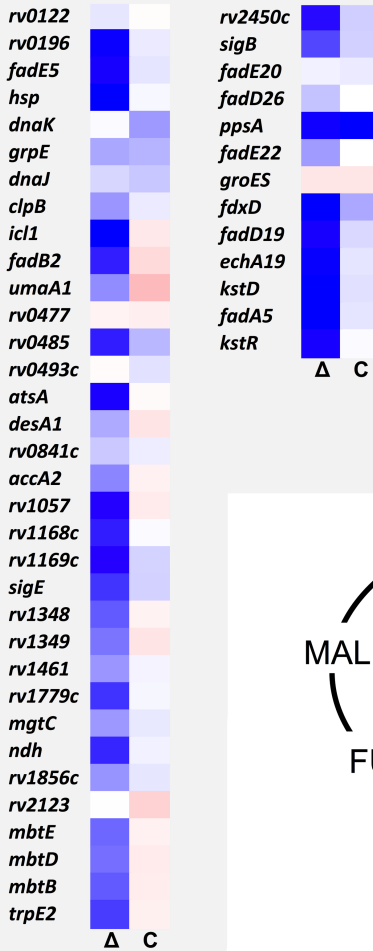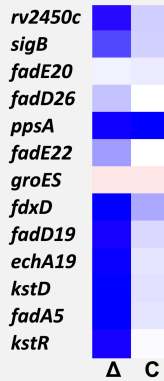

### Transporters

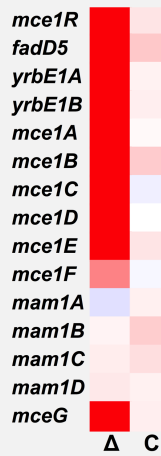

## Cholesterol

### Cholesterol breakdown

#### A & B rings

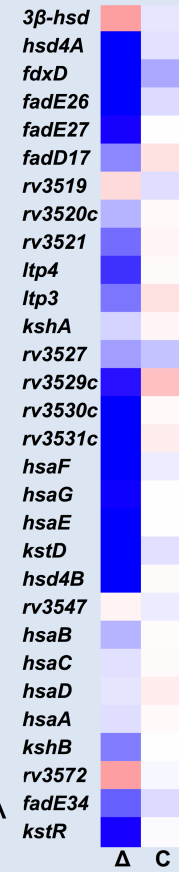

#### Side-chain

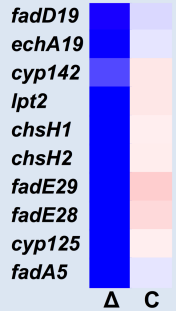

acetyl-CoA

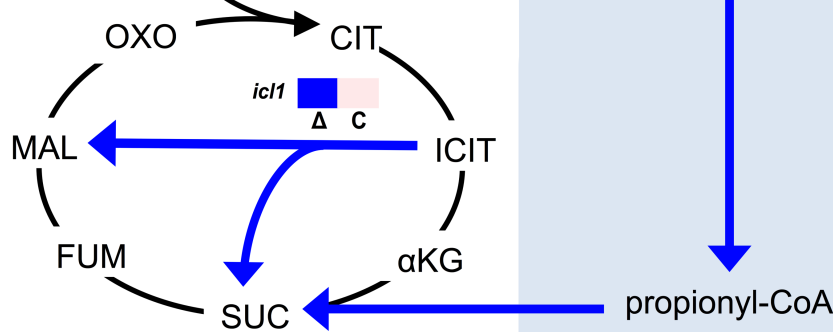

### Methylmalonyl

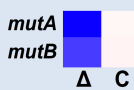

### Methylcitrate

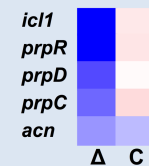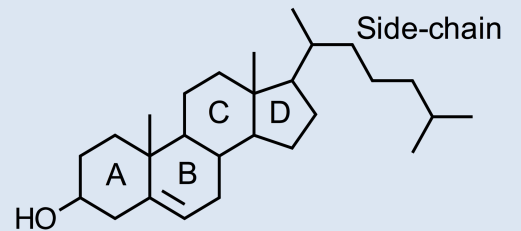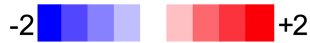

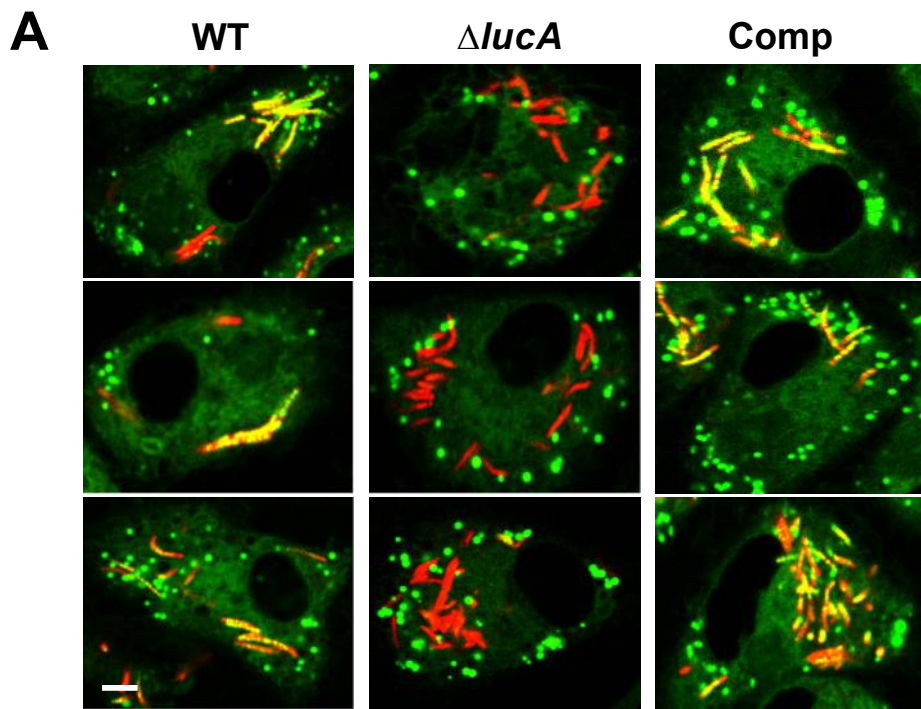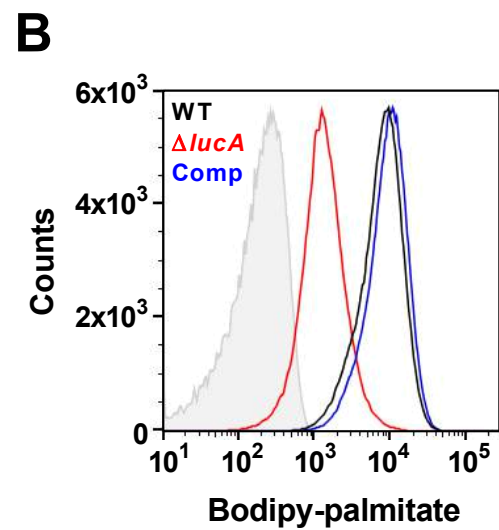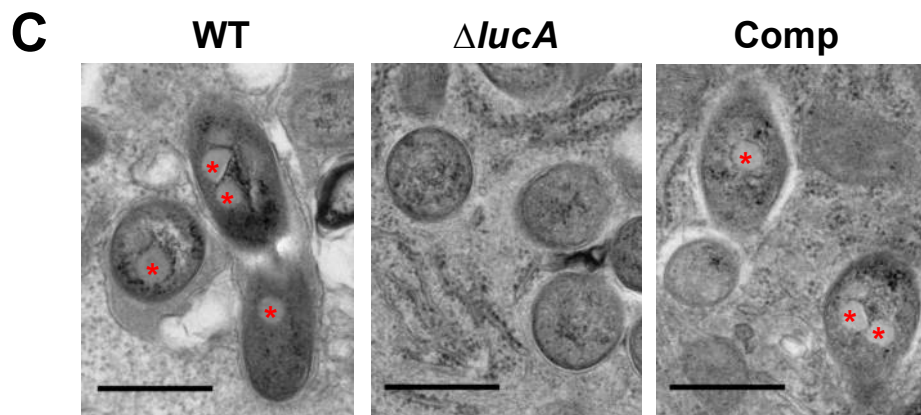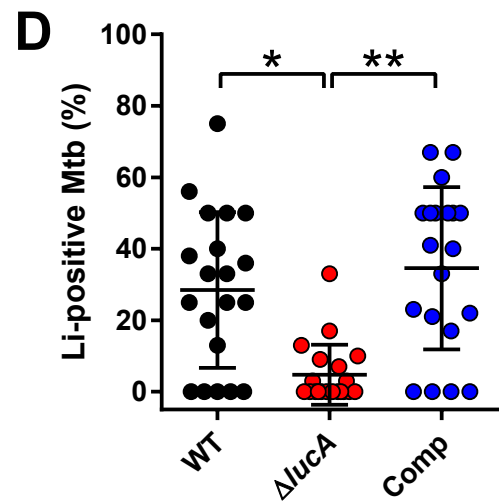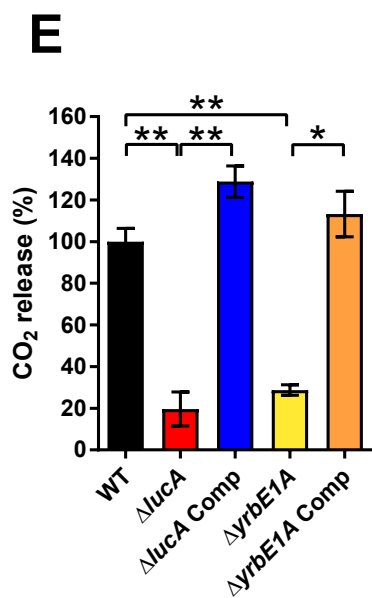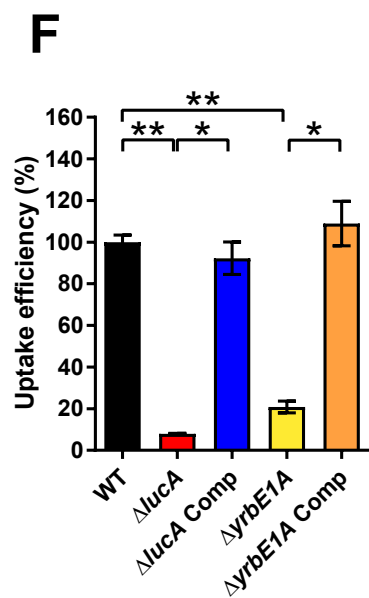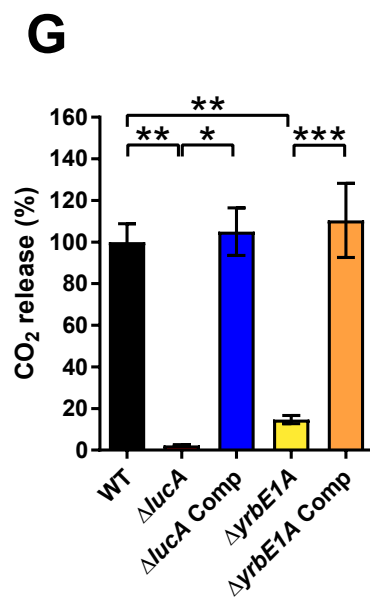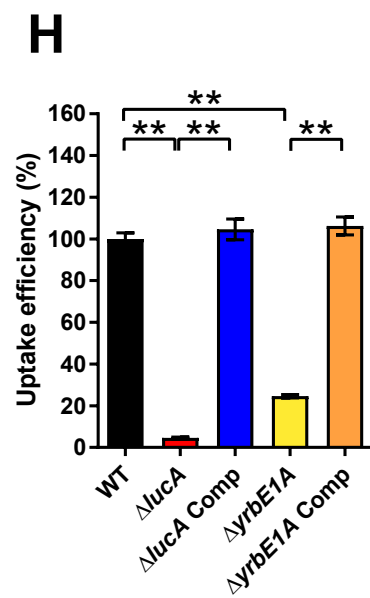

palmitate

oleate

**A**

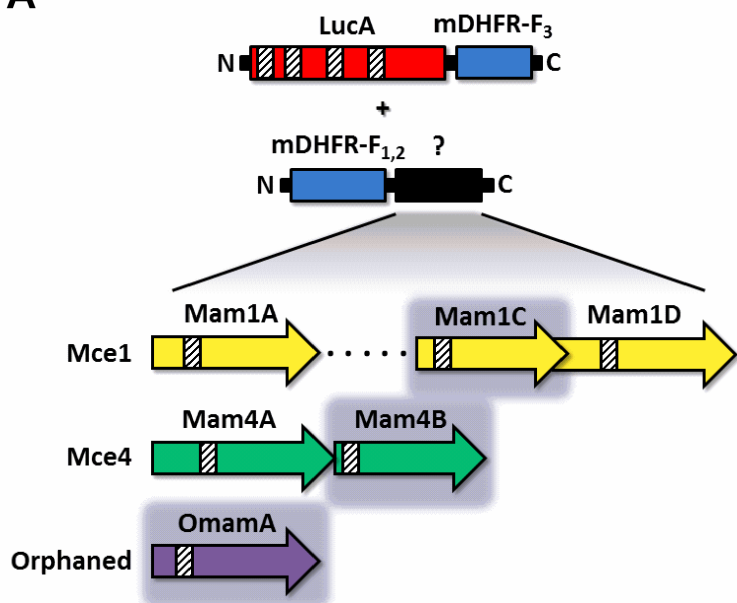

**B**

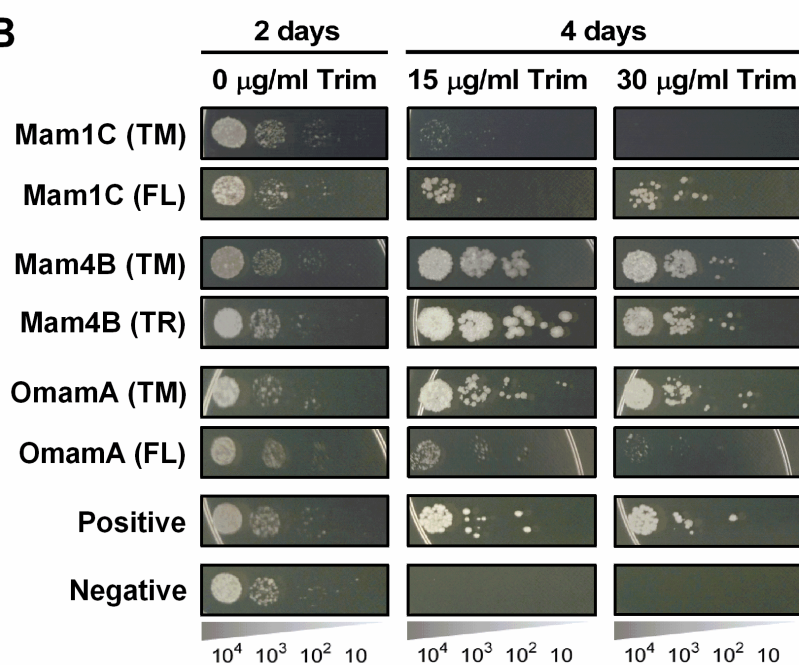

**C**

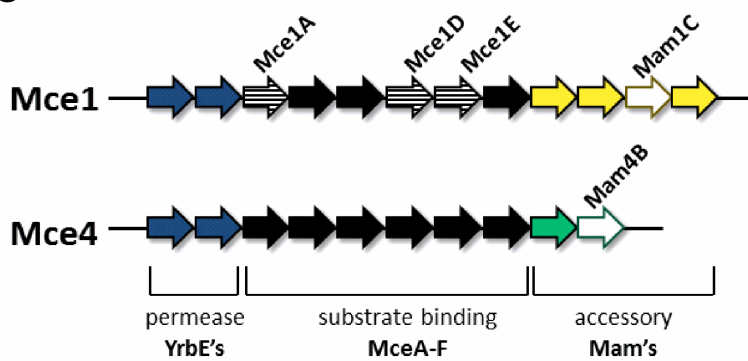

**D**

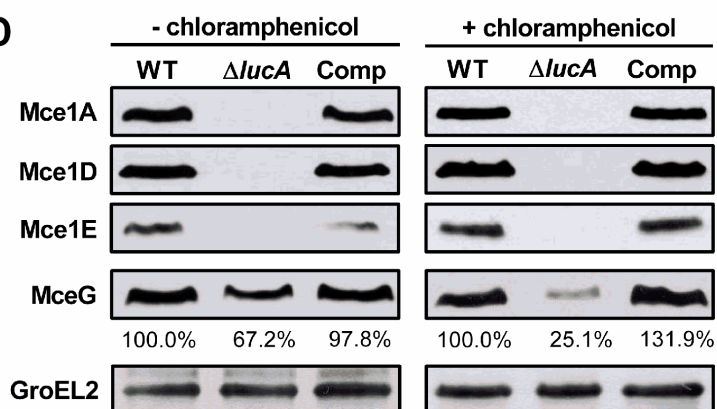

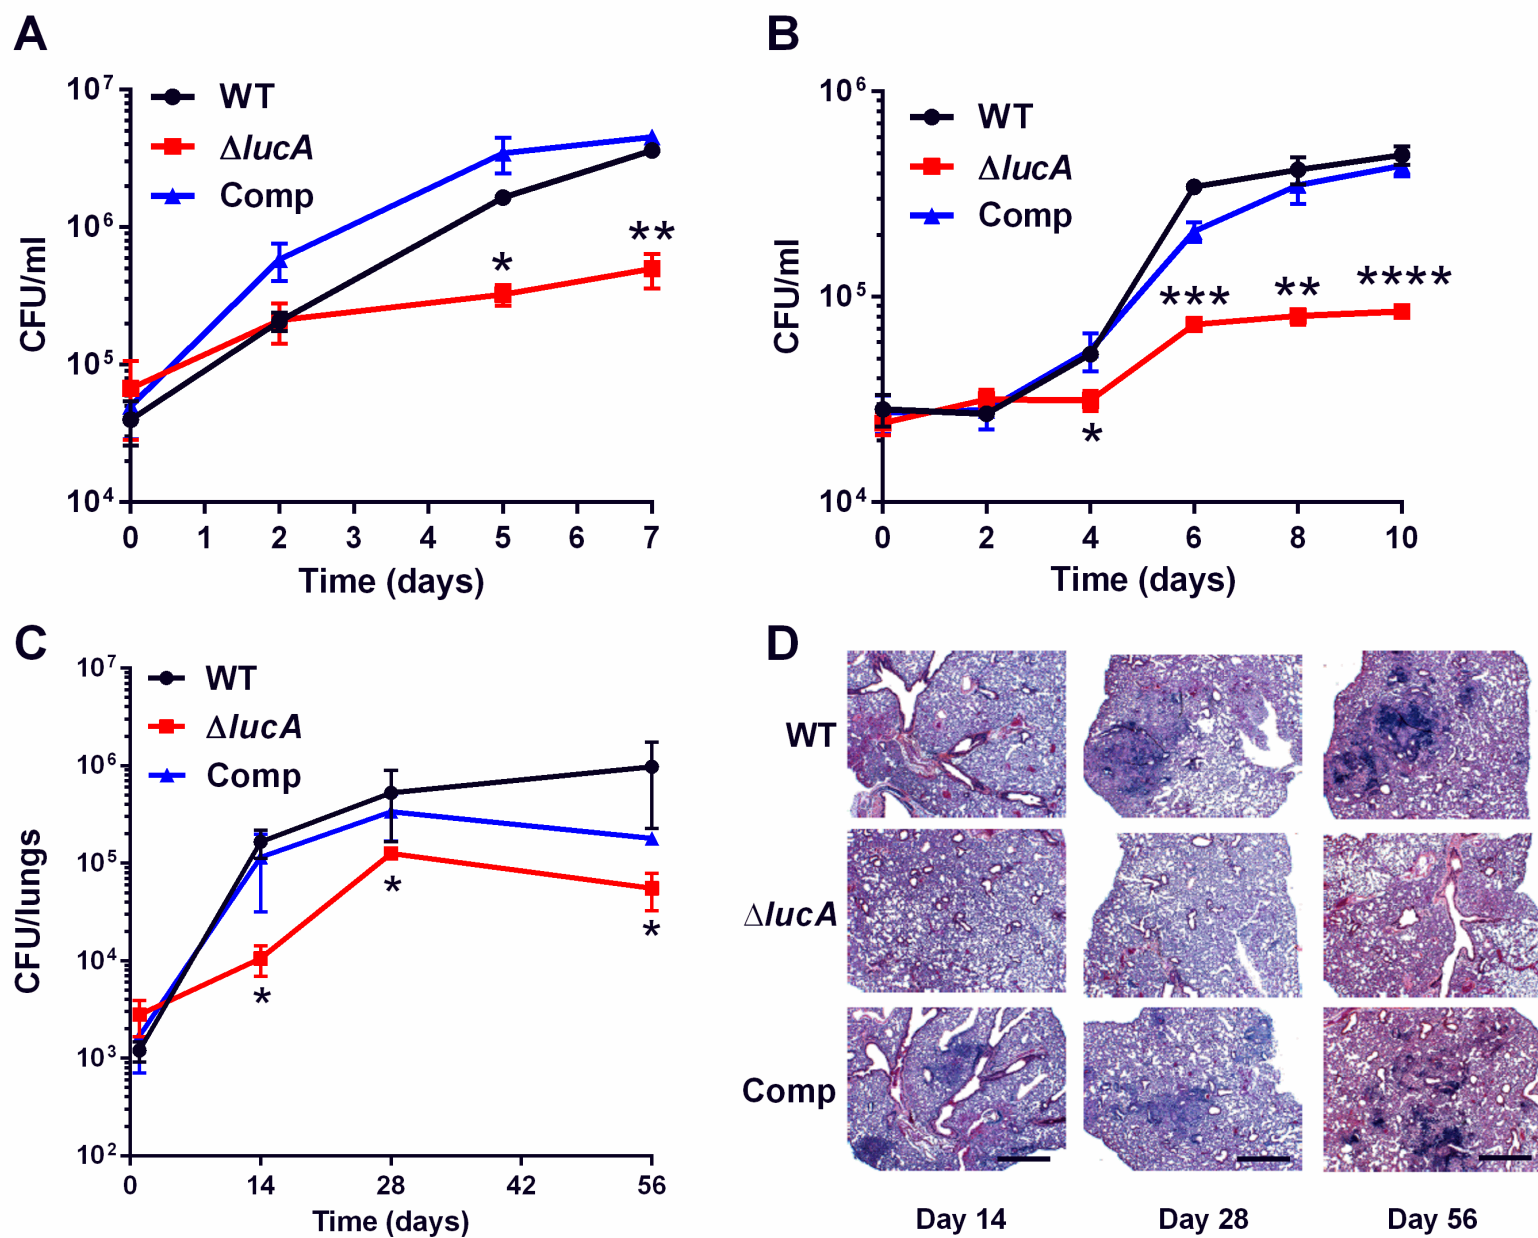

A

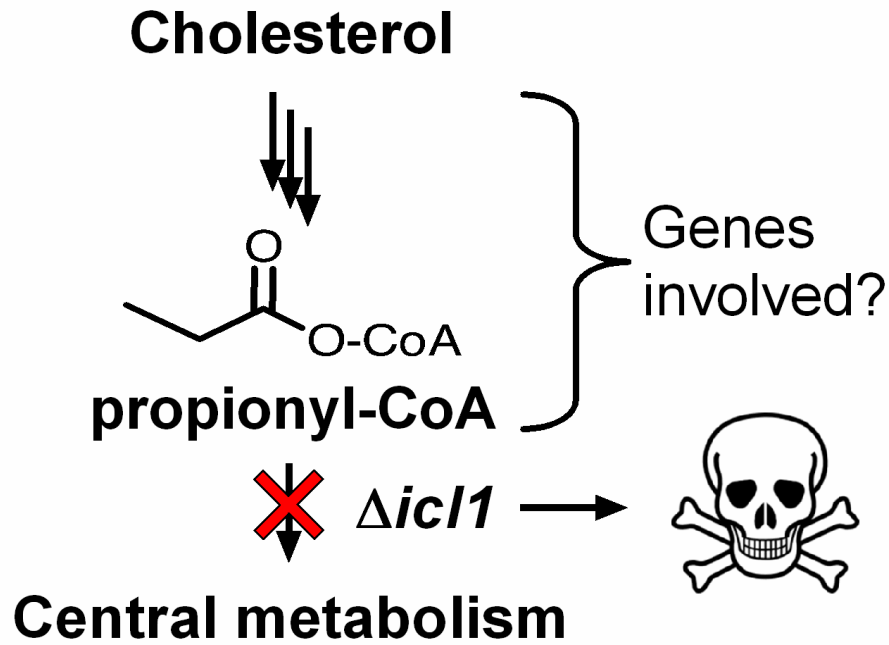

B

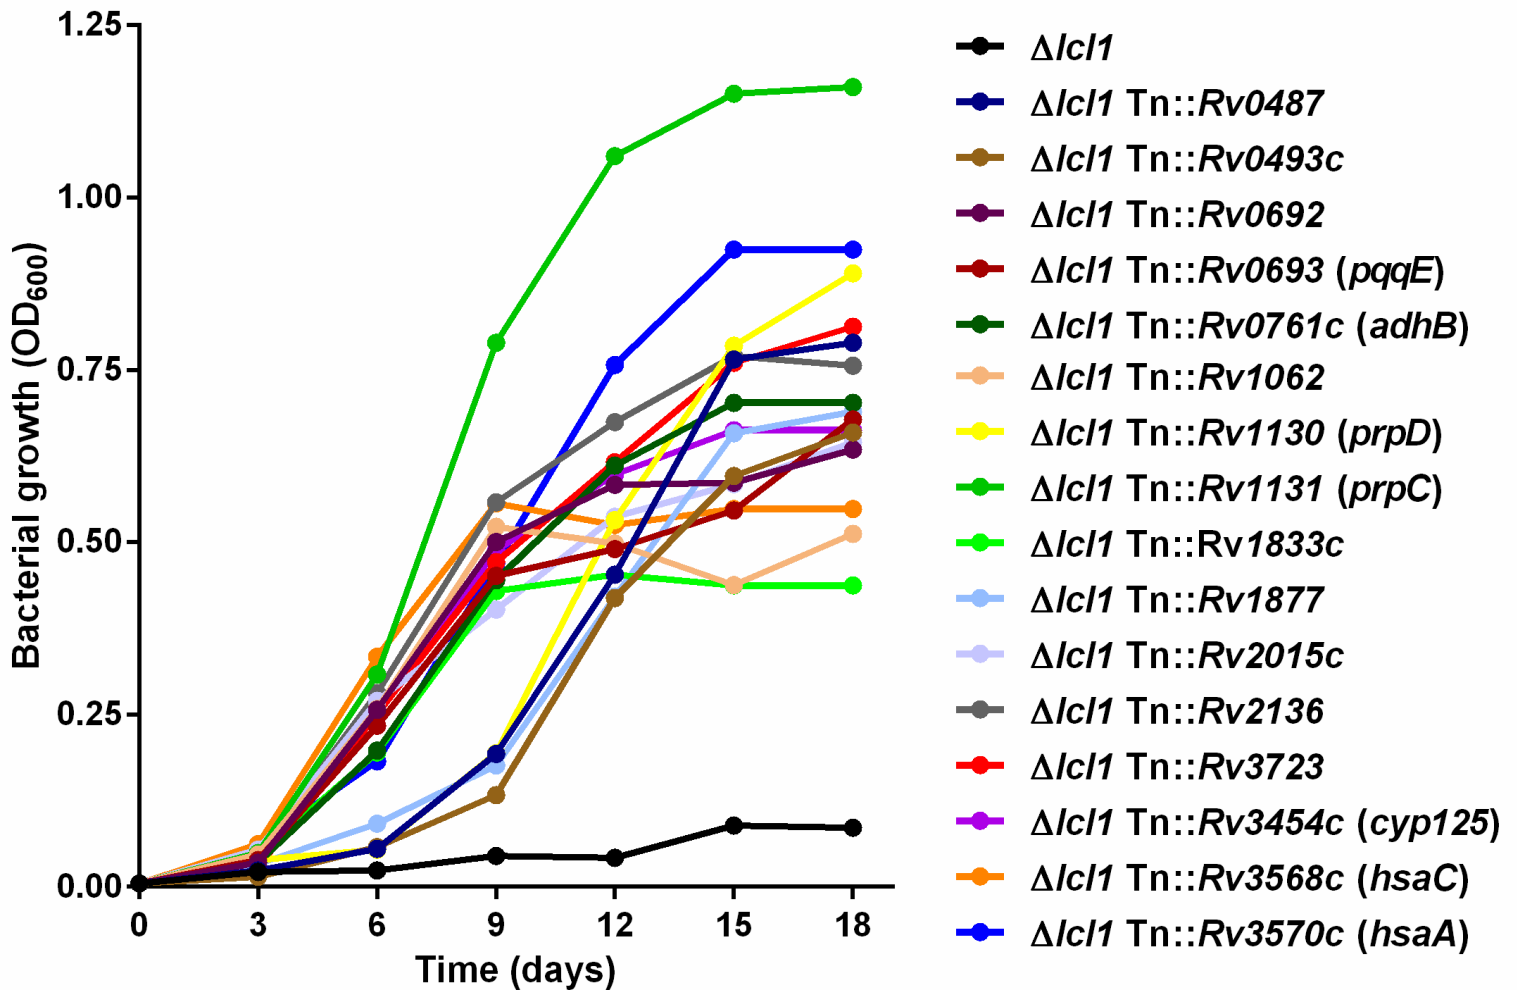

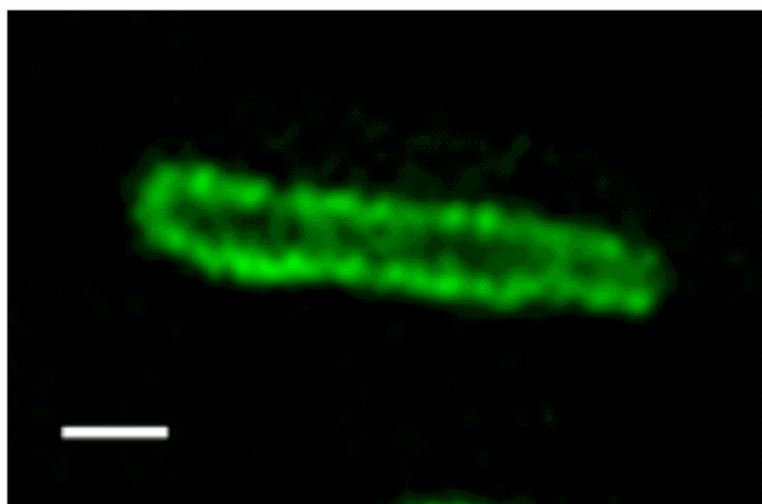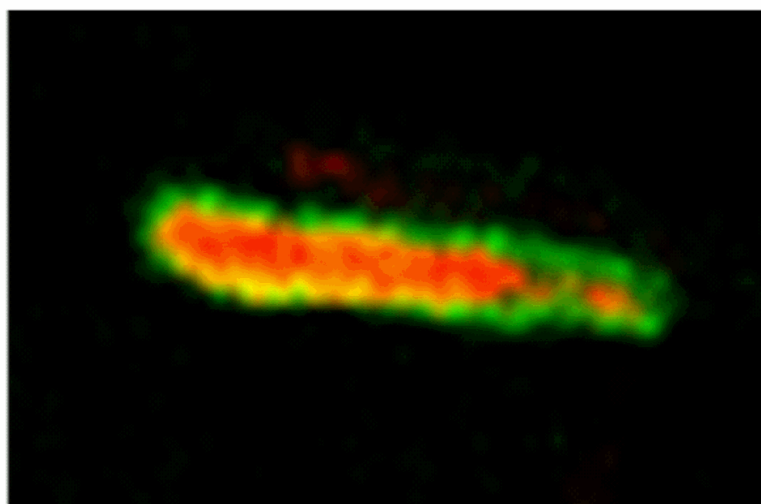

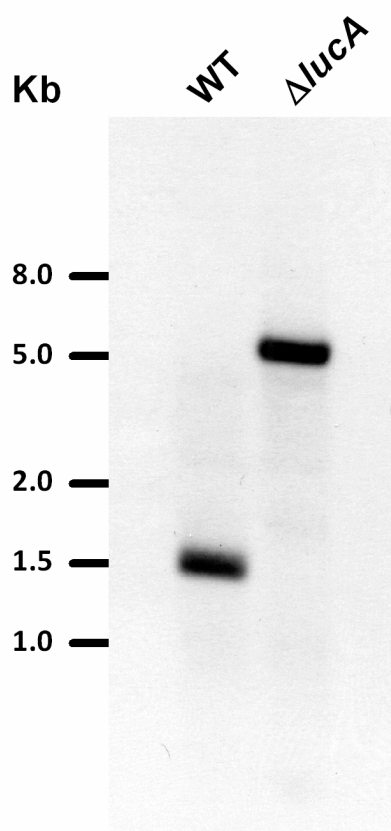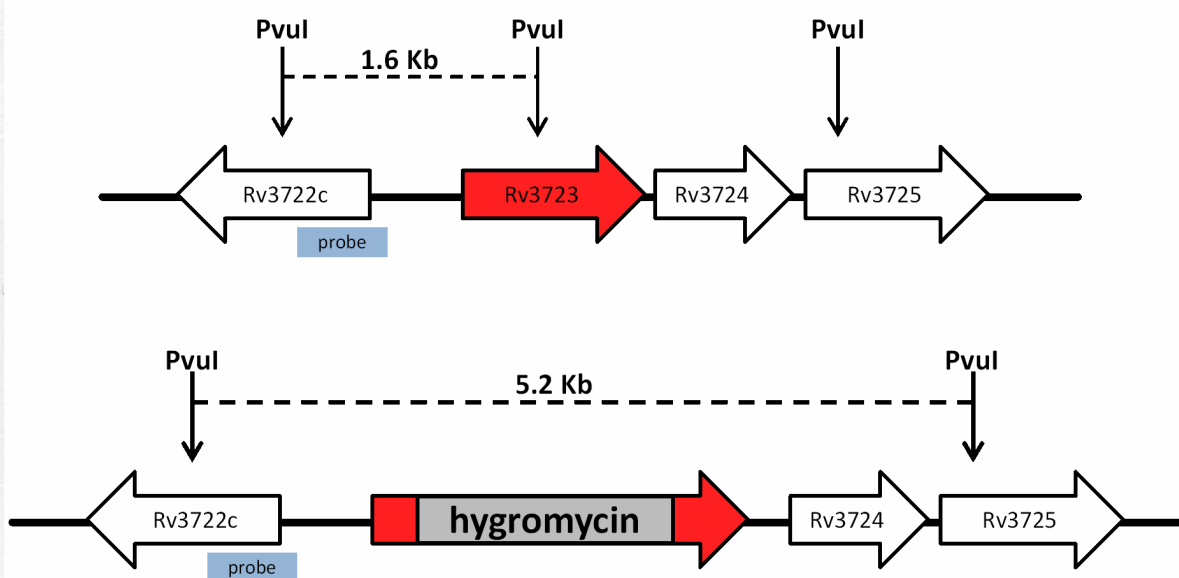



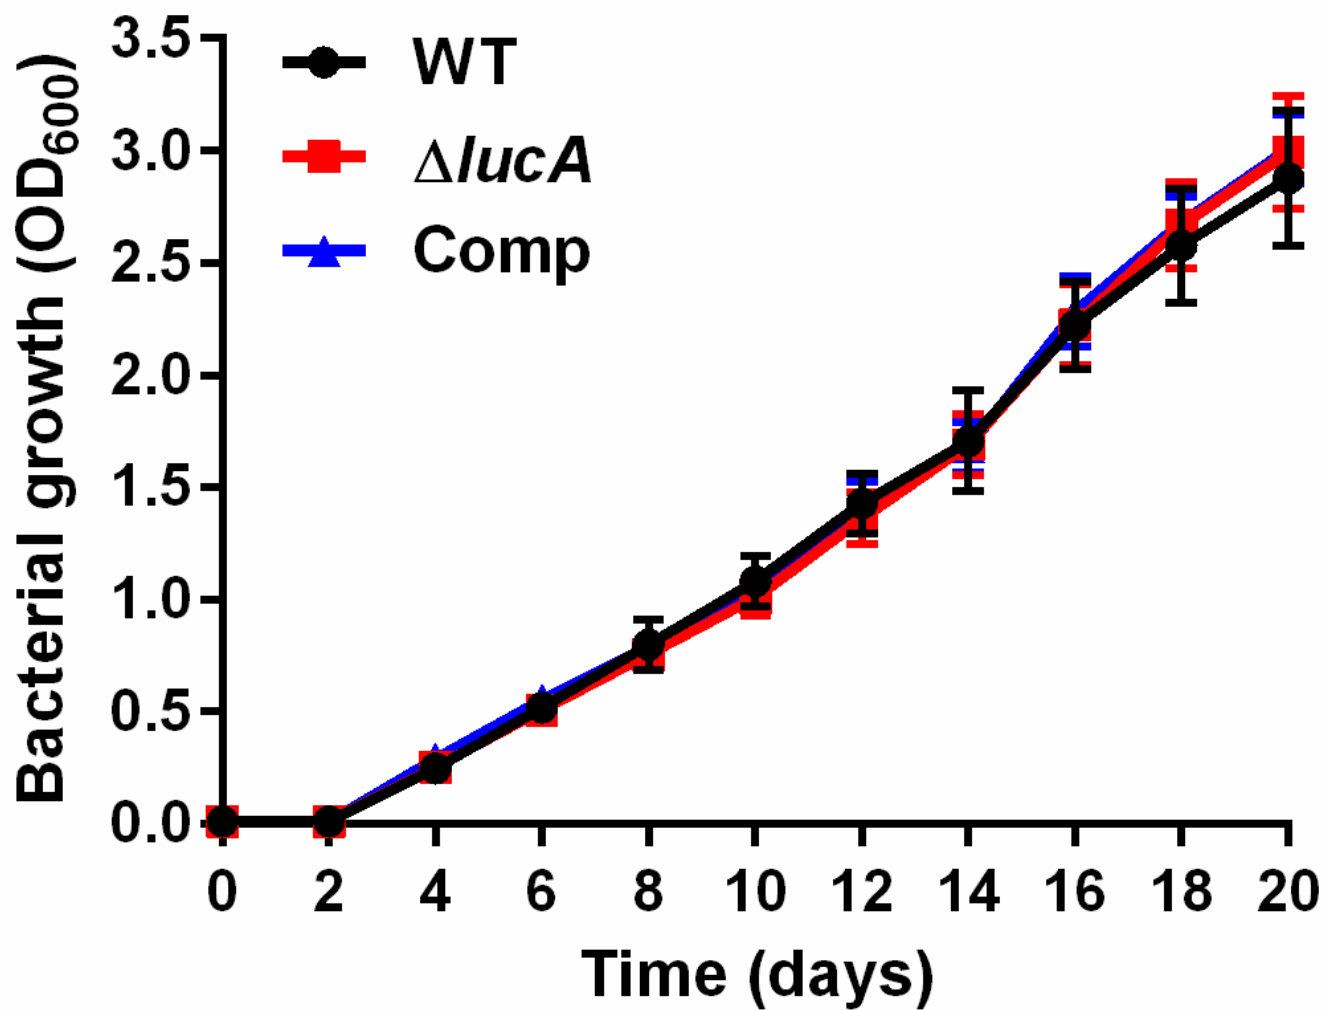

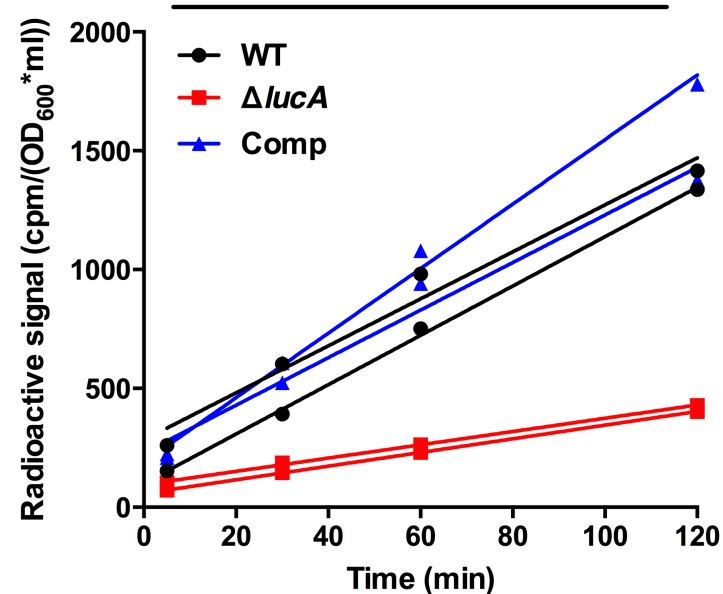

|               | Slope/Uptake rate | R <sup>2</sup> |
|---------------|-------------------|----------------|
| WT            | 10.38 ± 0.29      | 0.999          |
| WT            | 9.89 ± 1.16       | 0.973          |
| $\Delta lucA$ | 2.88 ± 0.02       | 0.999          |
| $\Delta lucA$ | 2.79 ± 0.09       | 0.998          |
| Comp          | 10.00 ± 1.11      | 0.976          |
| Comp          | 13.58 ± 0.81      | 0.993          |

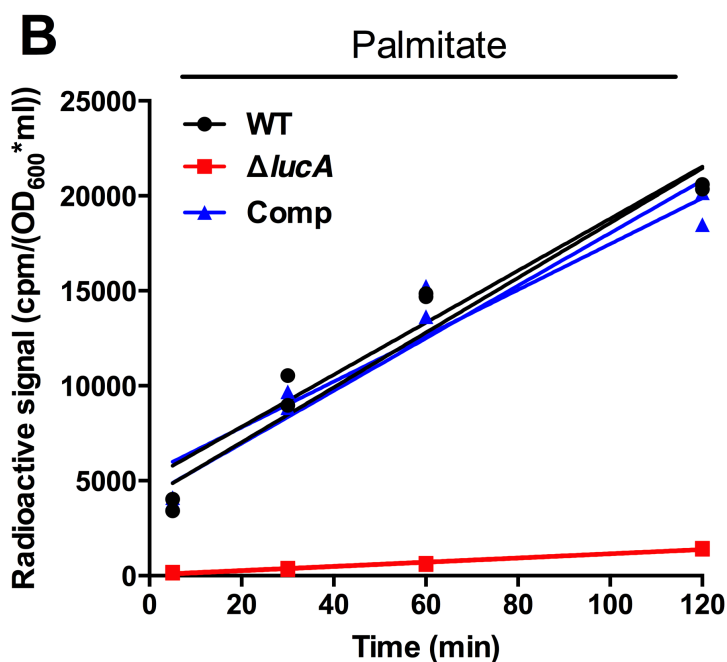

|               | Slope/Uptake rate | R <sup>2</sup> |
|---------------|-------------------|----------------|
| WT            | 144.2 ± 22.9      | 0.952          |
| WT            | 137.0 ± 22.7      | 0.948          |
| $\Delta lucA$ | 11.03 ± 0.88      | 0.988          |
| $\Delta lucA$ | 11.16 ± 1.09      | 0.981          |
| Comp          | 120.7 ± 29.4      | 0.894          |
| Comp          | 138.5 ± 14.1      | 0.980          |

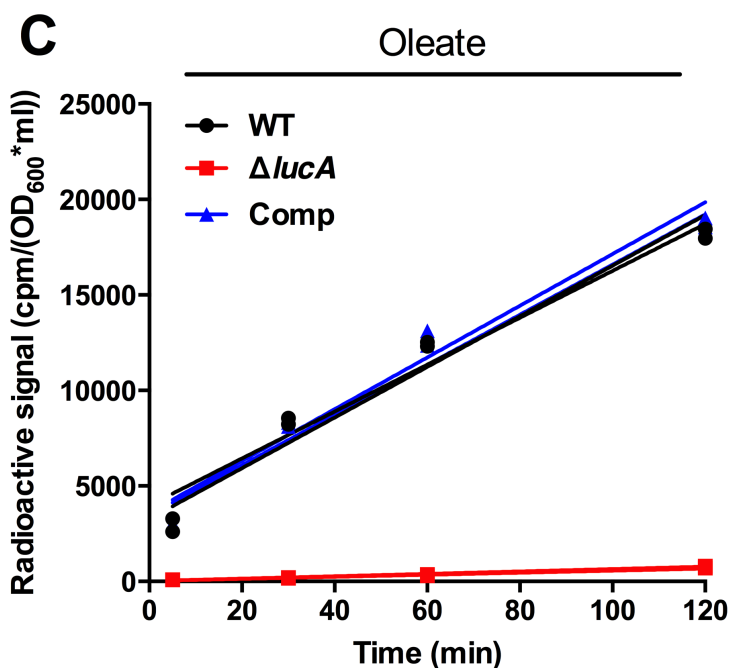

|               | Slope/Uptake rate | R <sup>2</sup> |
|---------------|-------------------|----------------|
| WT            | 132.6 ± 17.3      | 0.967          |
| WT            | 122.8 ± 17.4      | 0.962          |
| $\Delta lucA$ | 6.27 ± 0.46       | 0.990          |
| $\Delta lucA$ | 5.38 ± 0.57       | 0.978          |
| Comp          | 131.3 ± 14.7      | 0.976          |
| Comp          | 135.4 ± 17.7      | 0.967          |

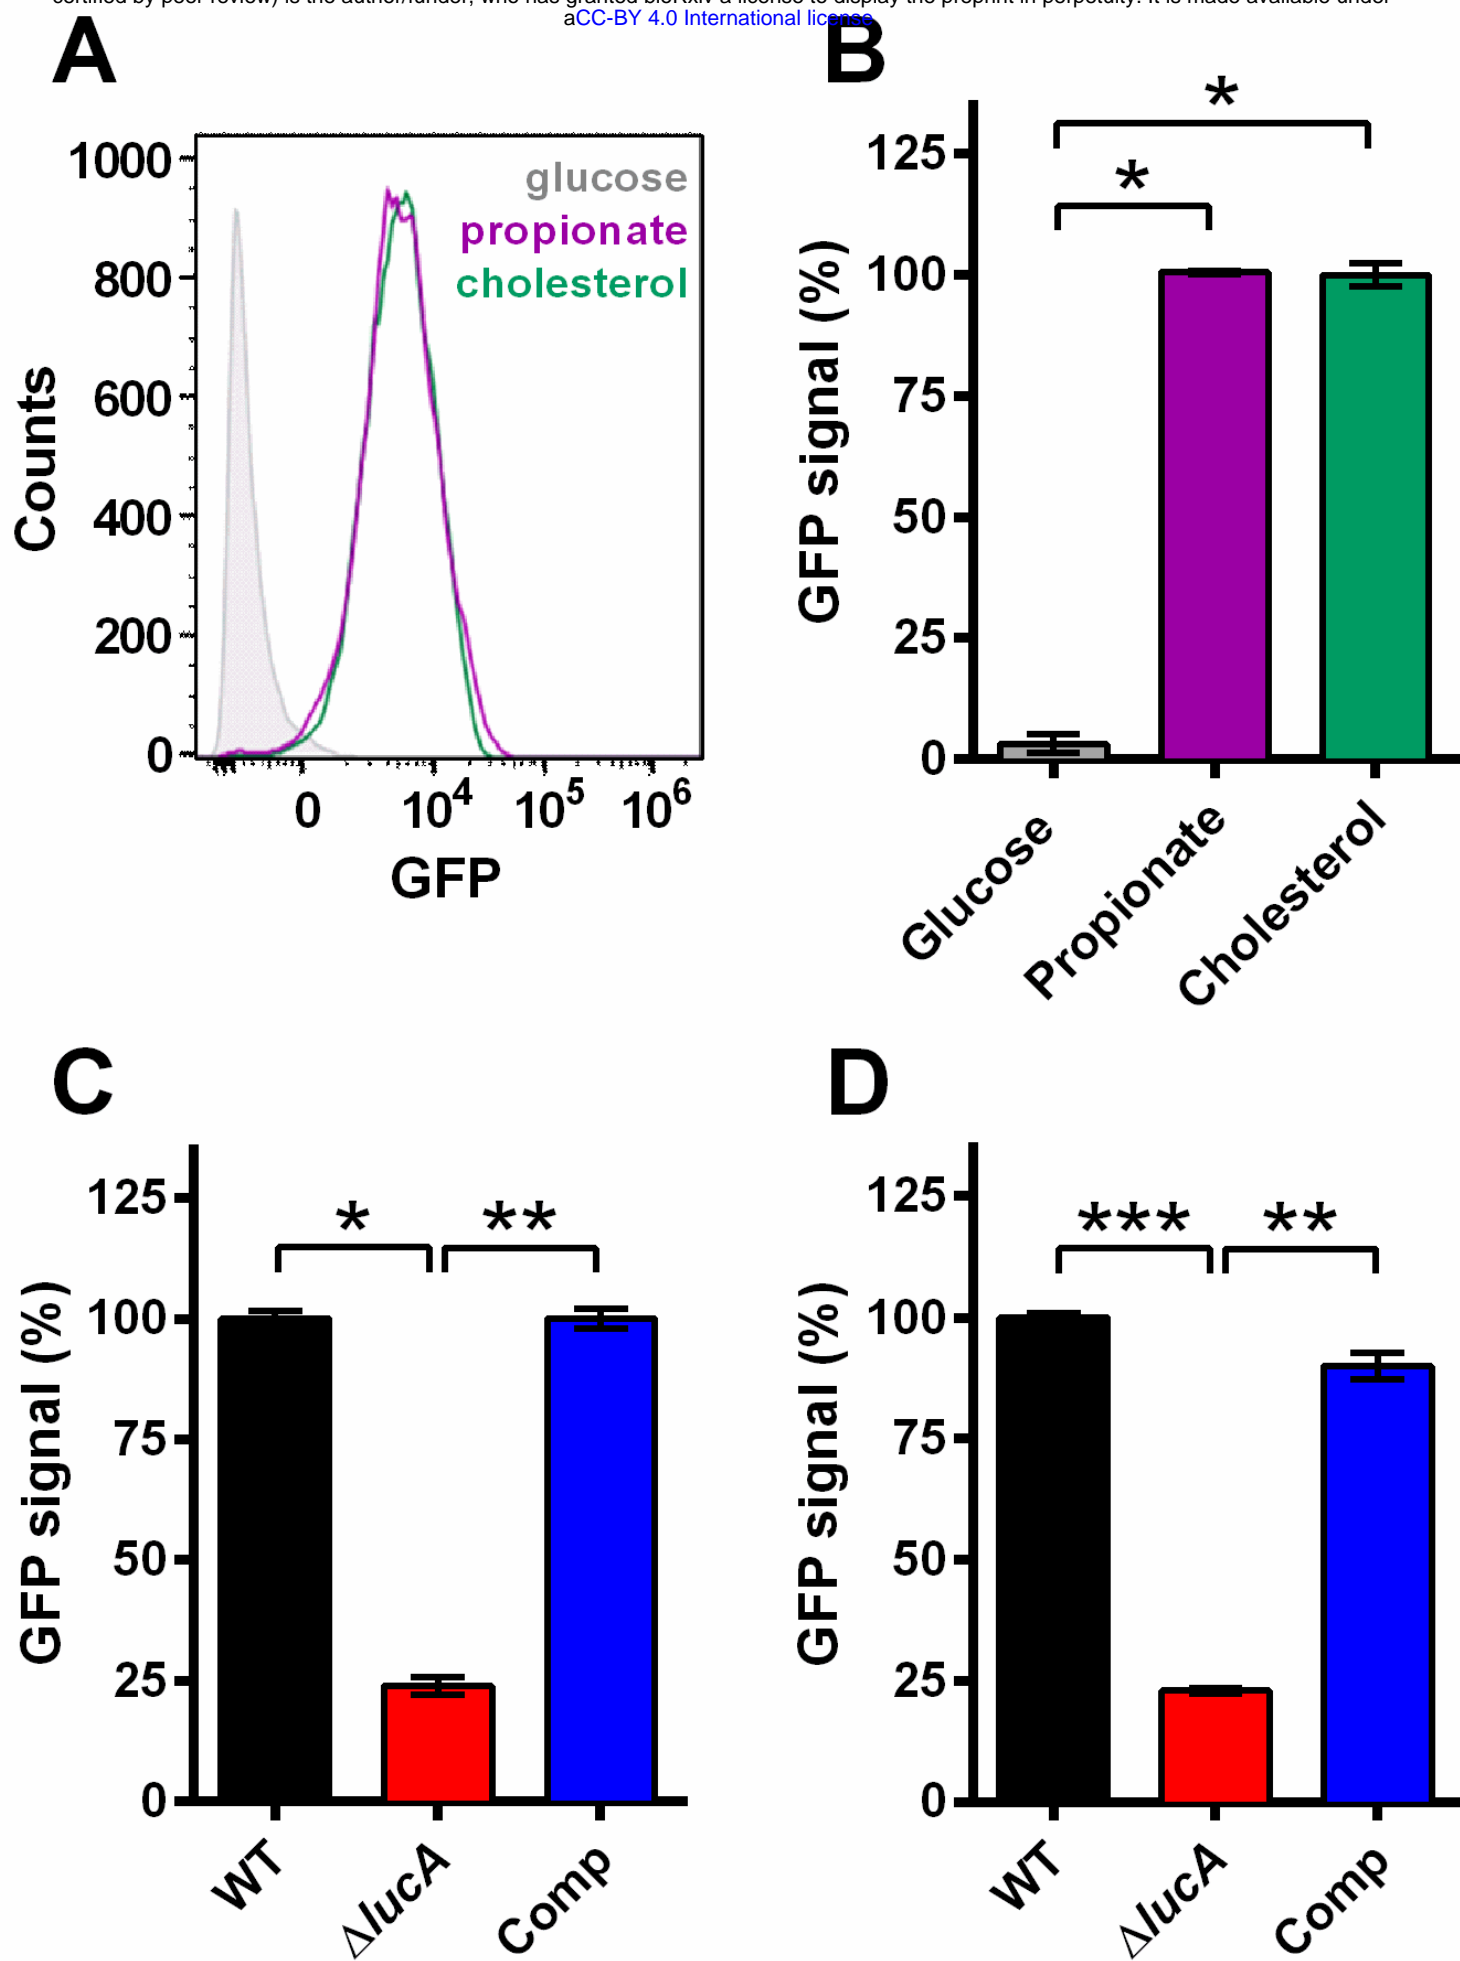

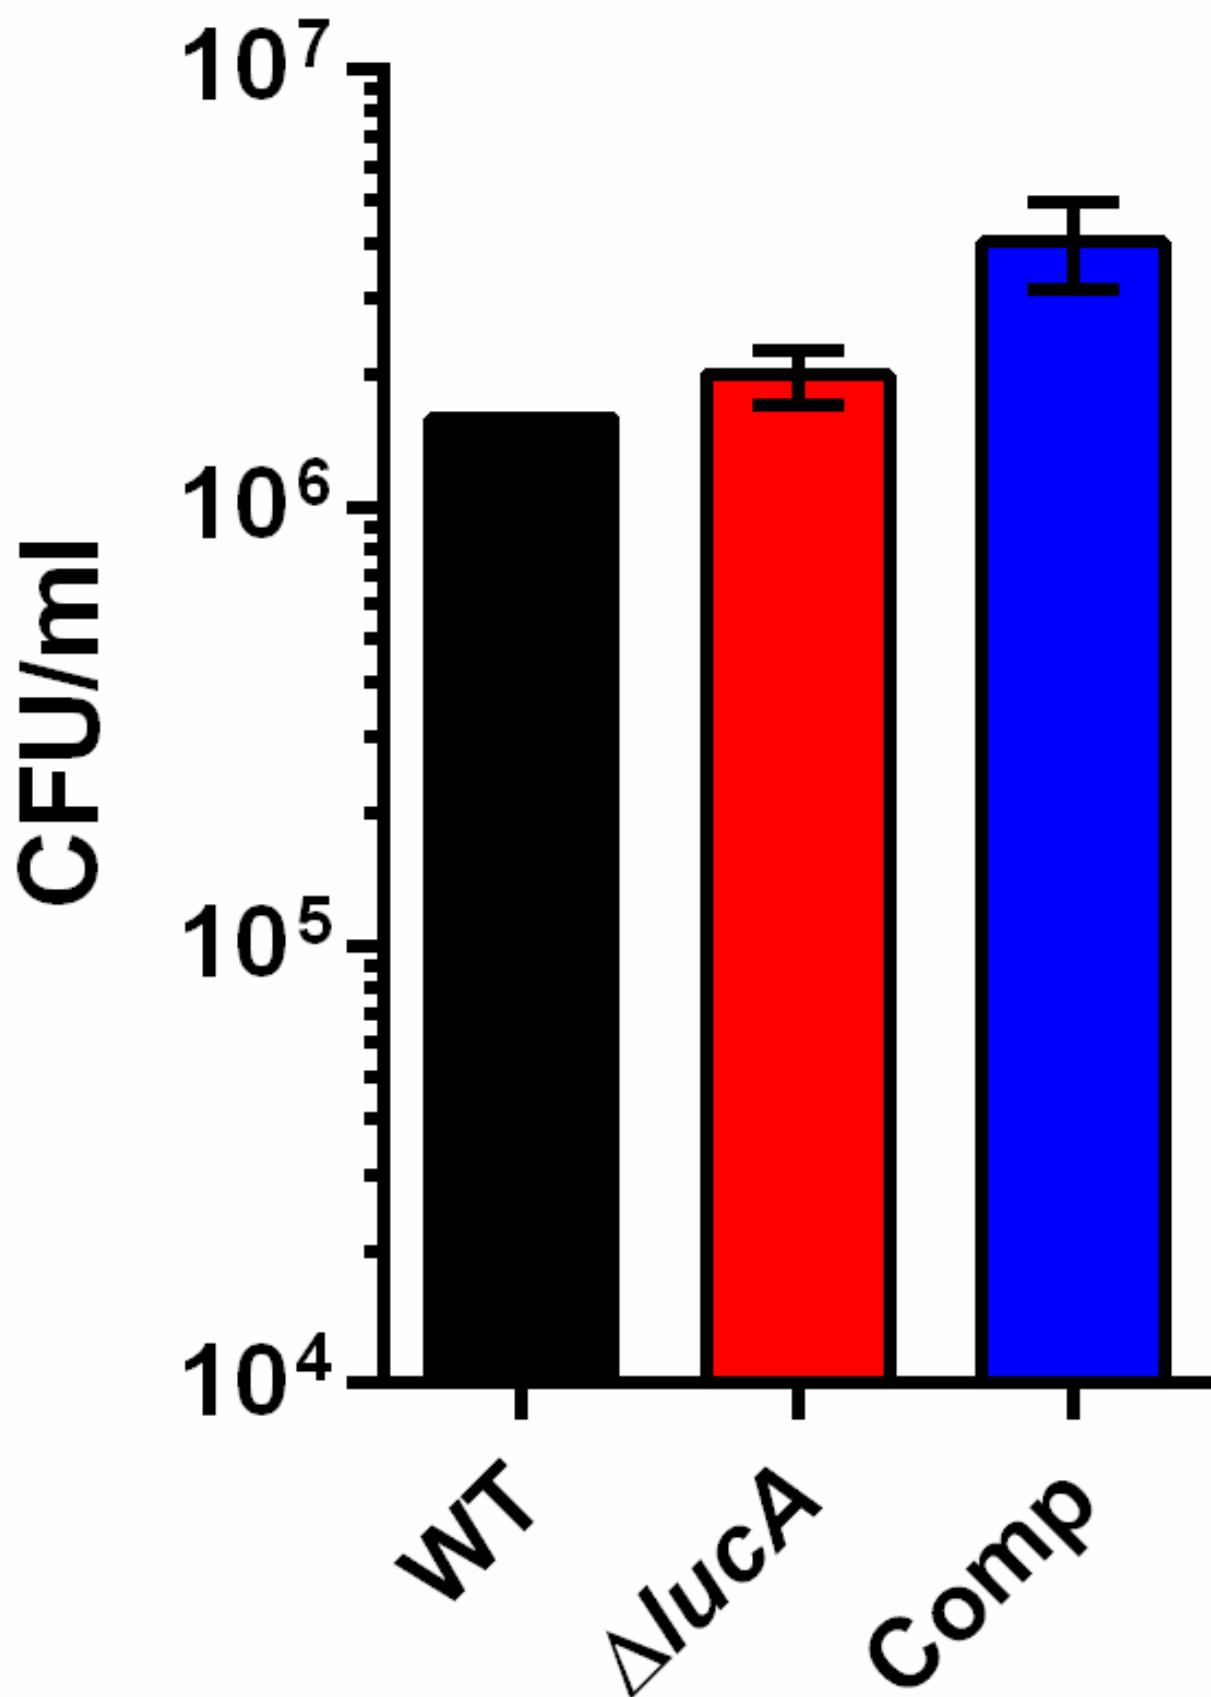

**WT**

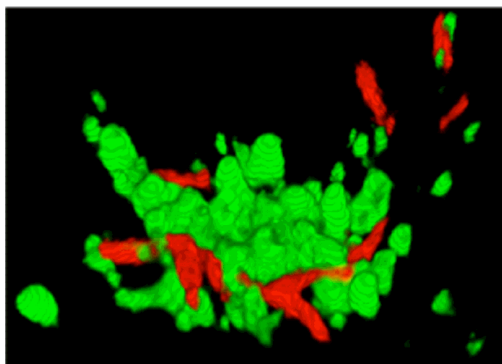

**$\Delta lucA$**

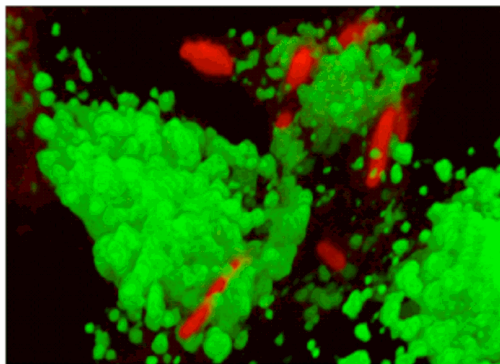

**Comp**

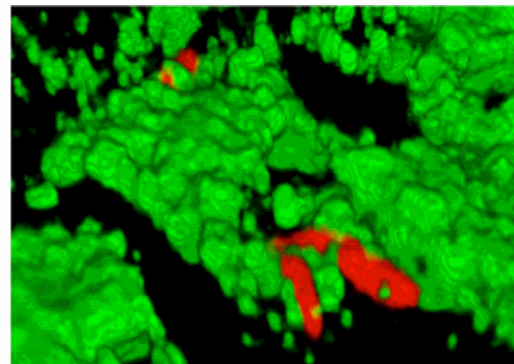

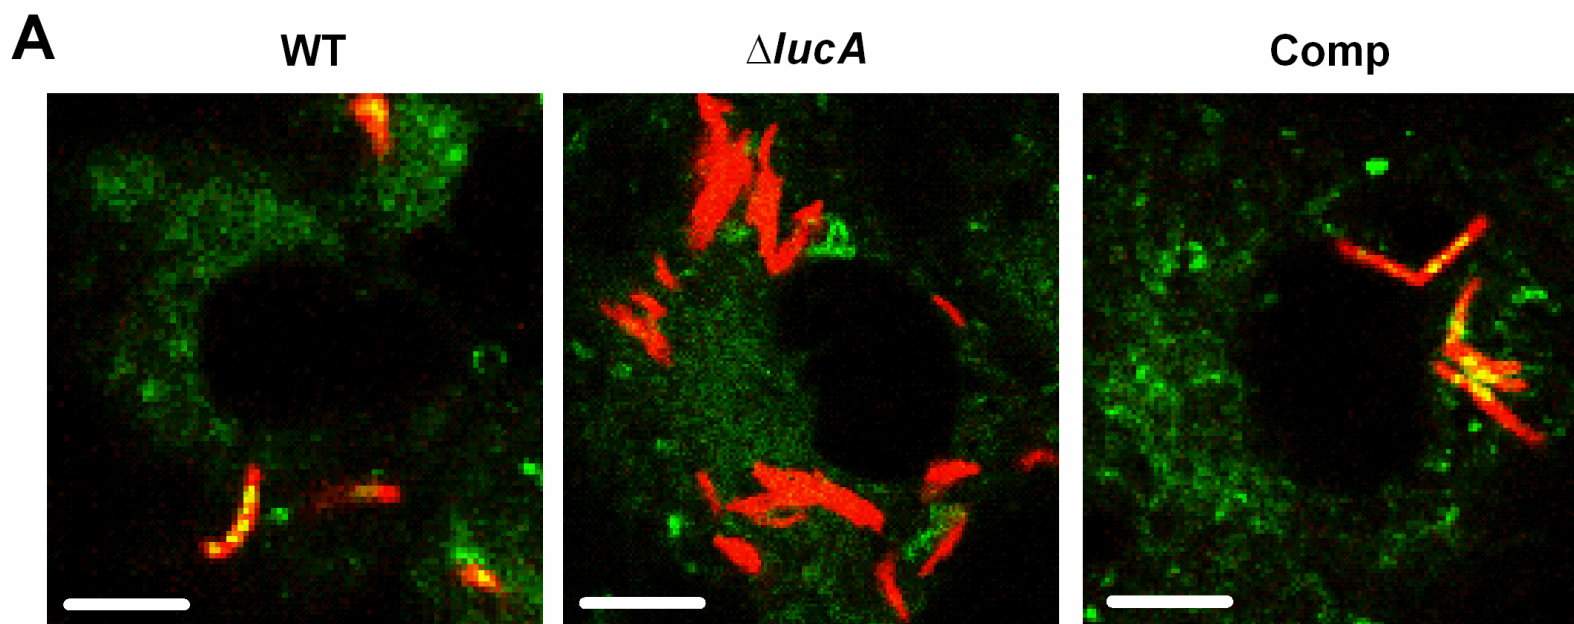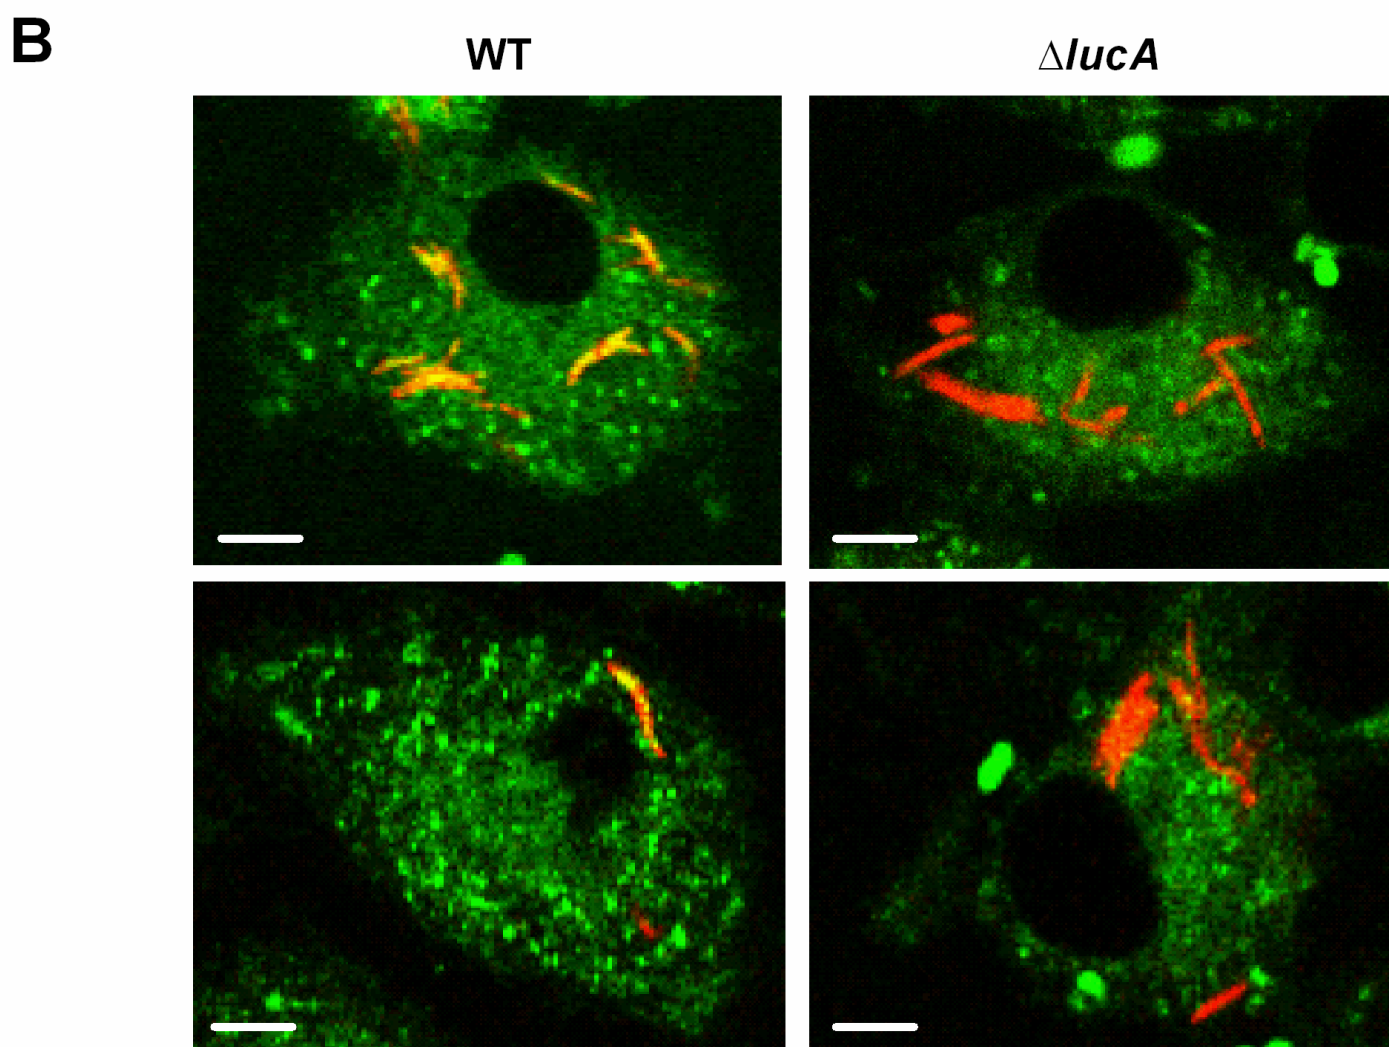

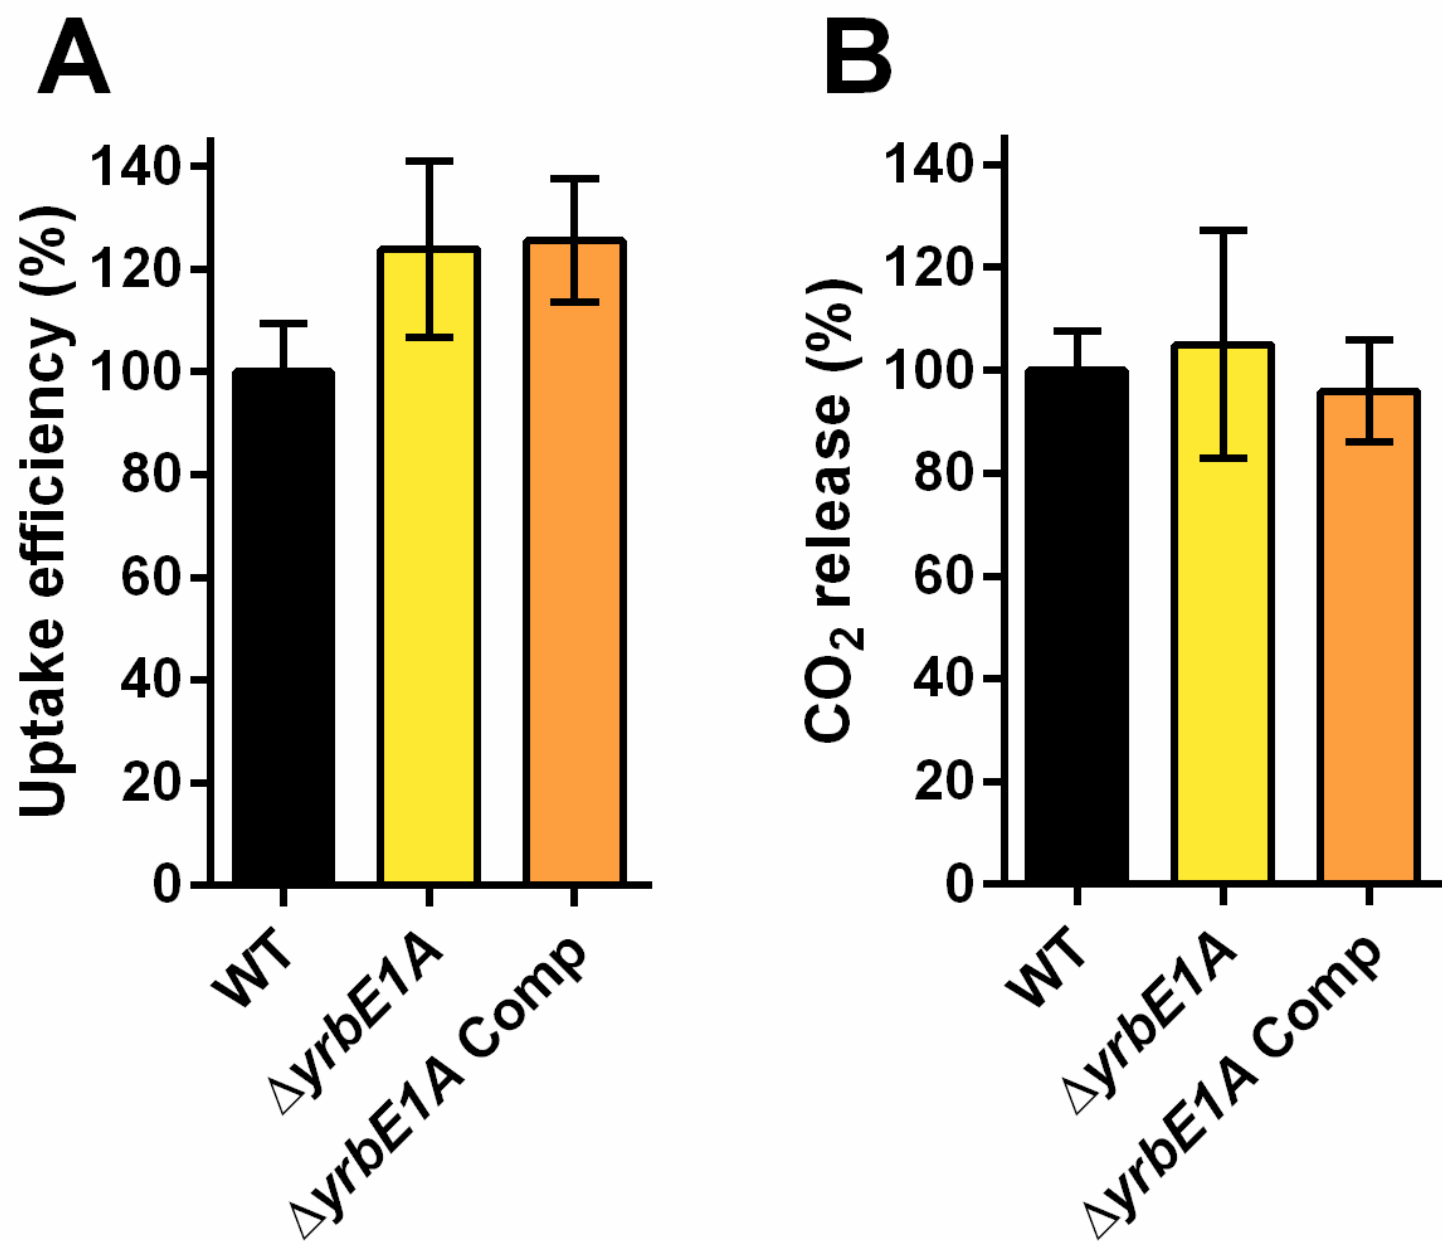

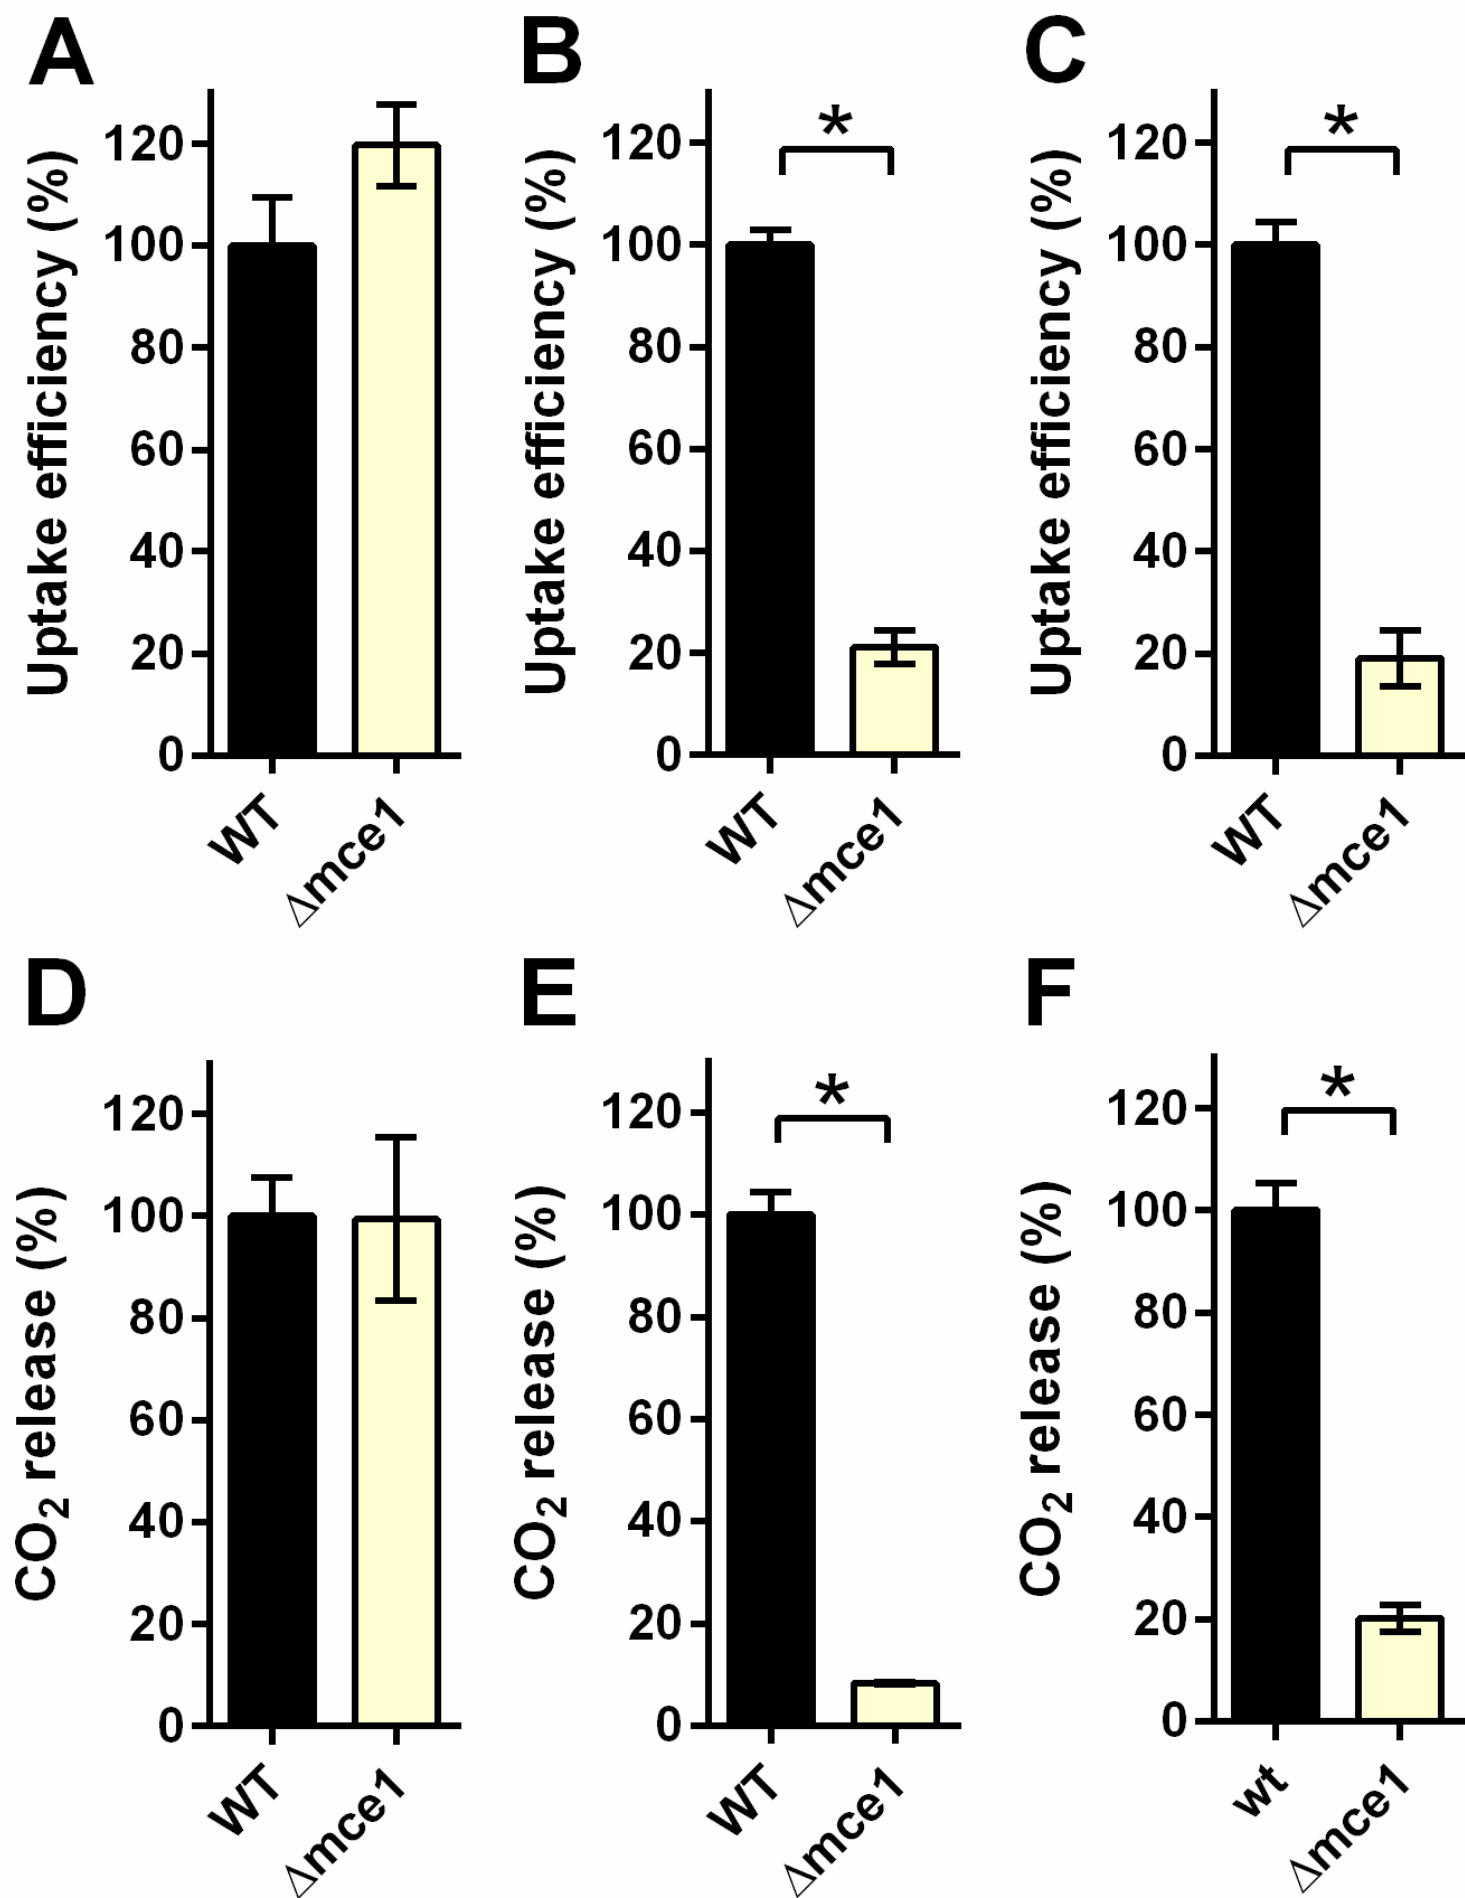



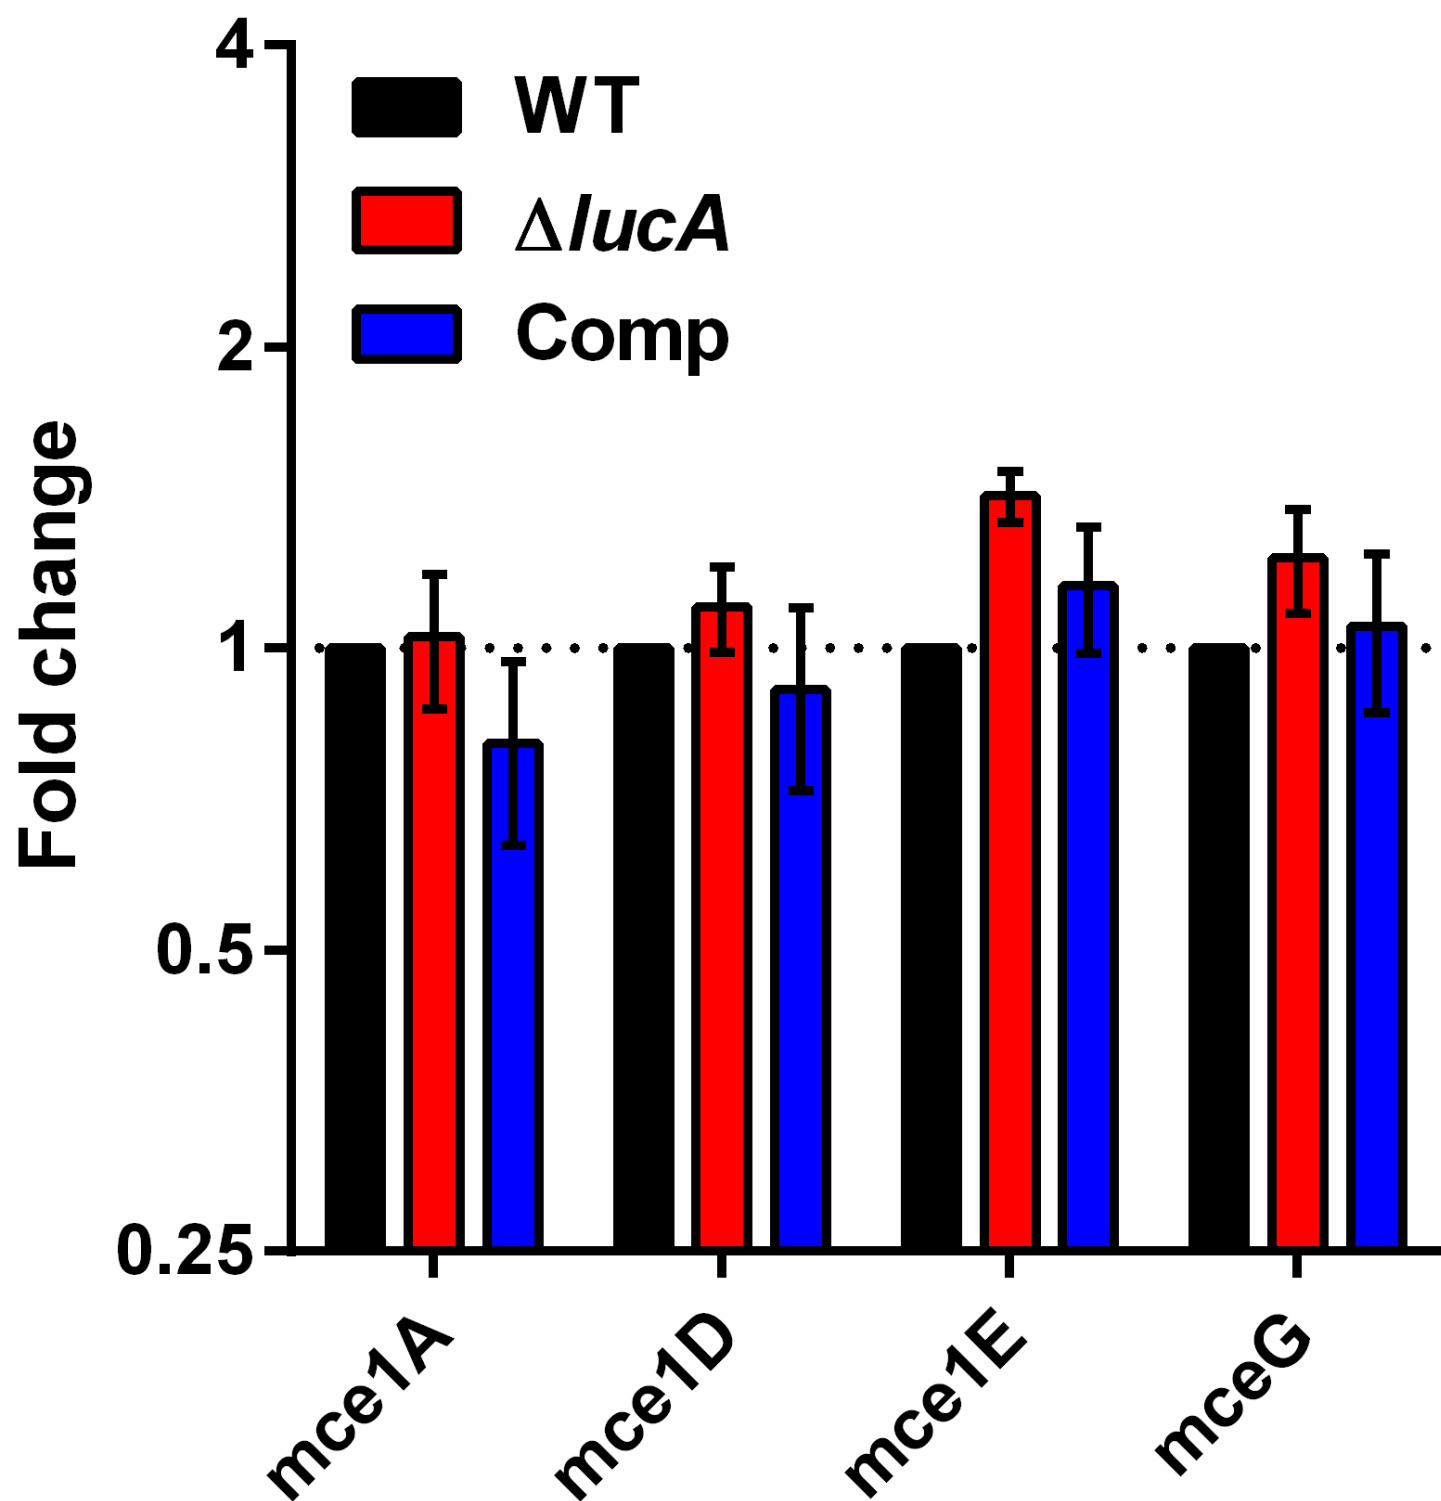

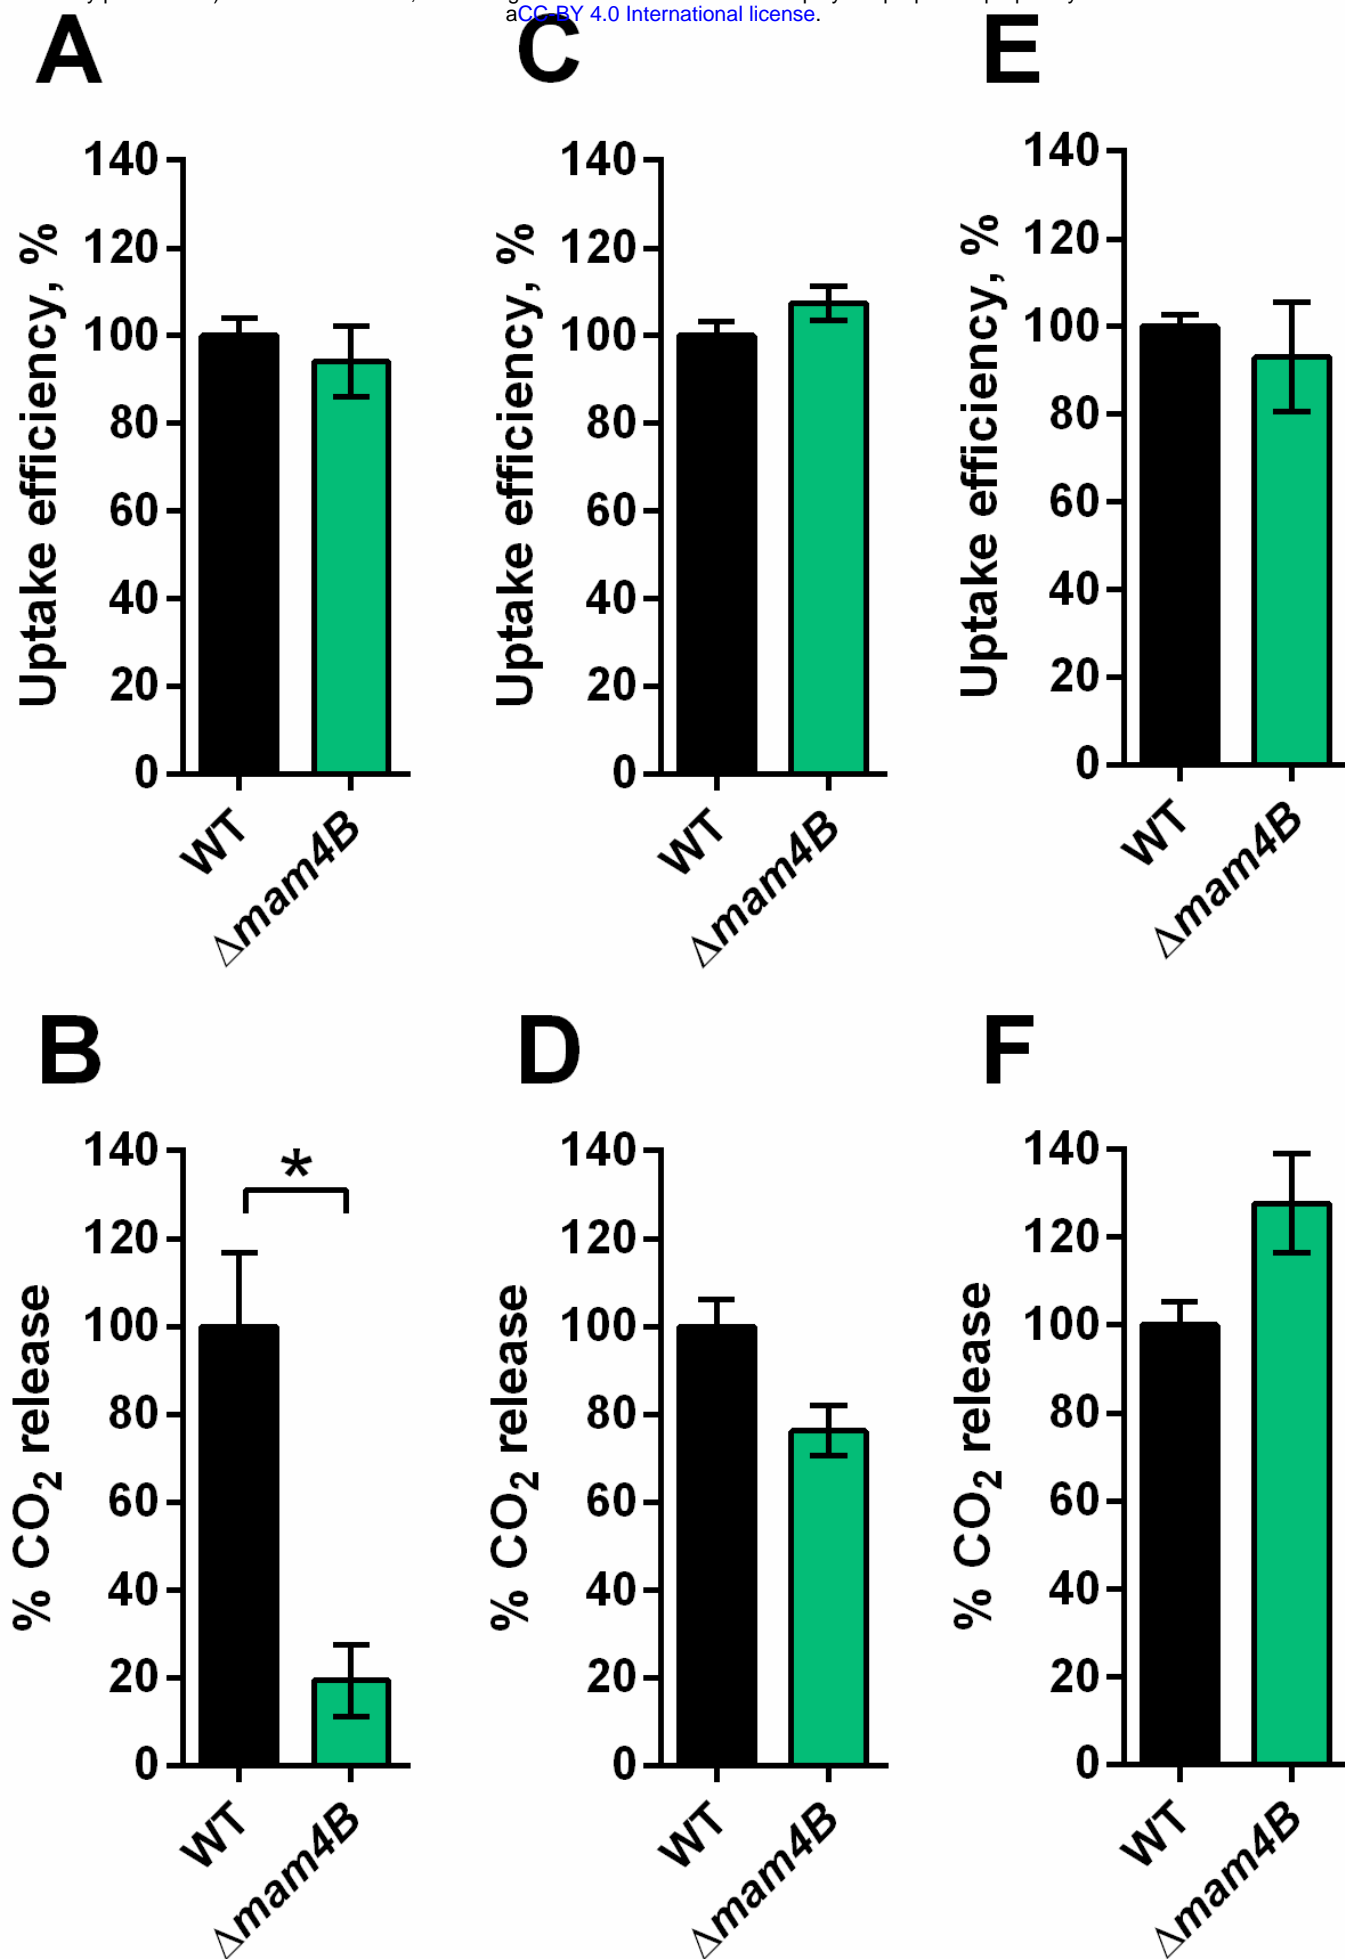

**A**

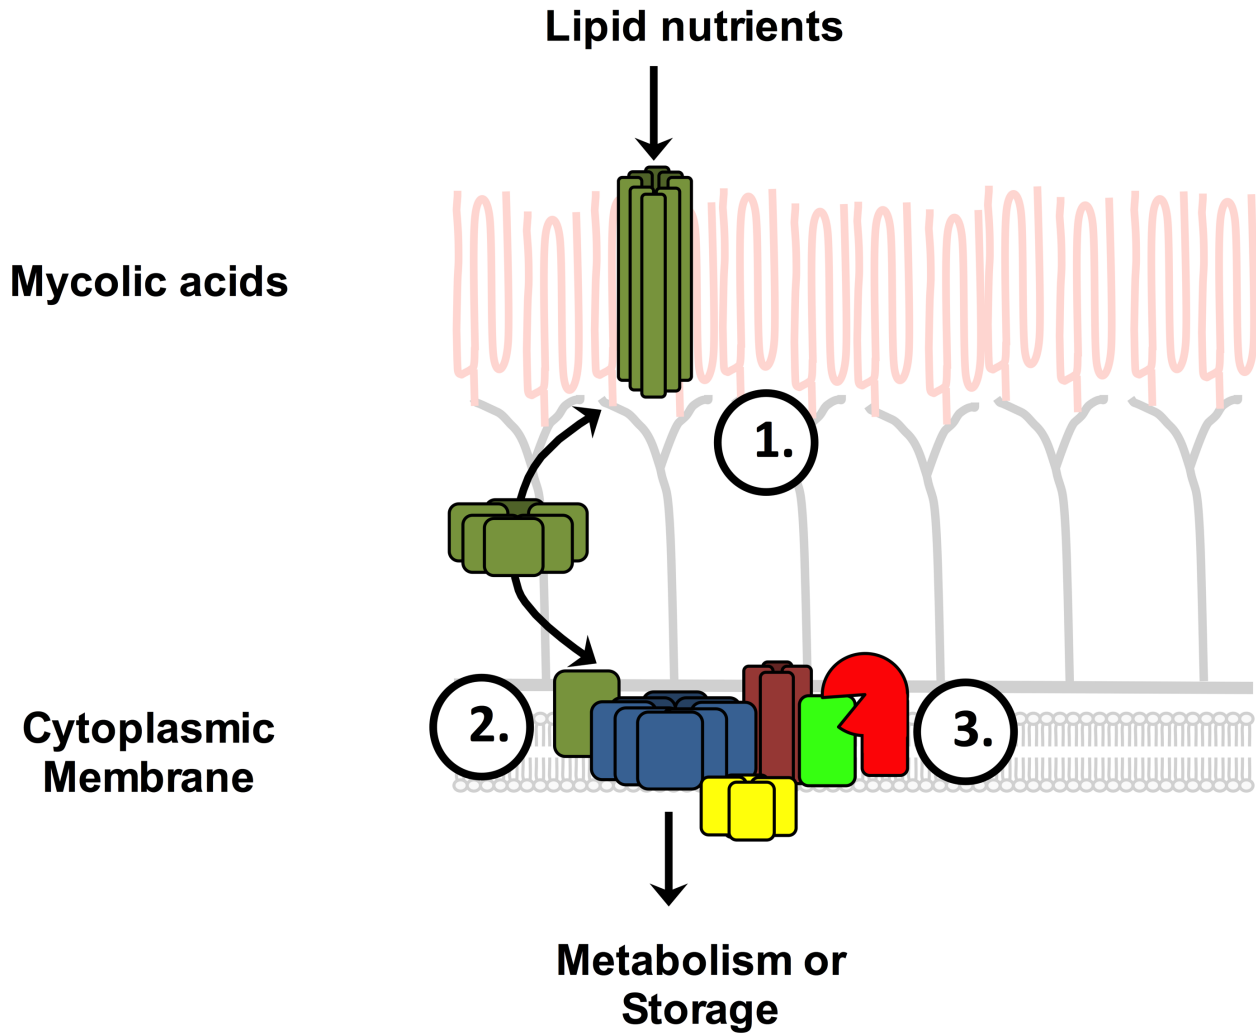

**B**

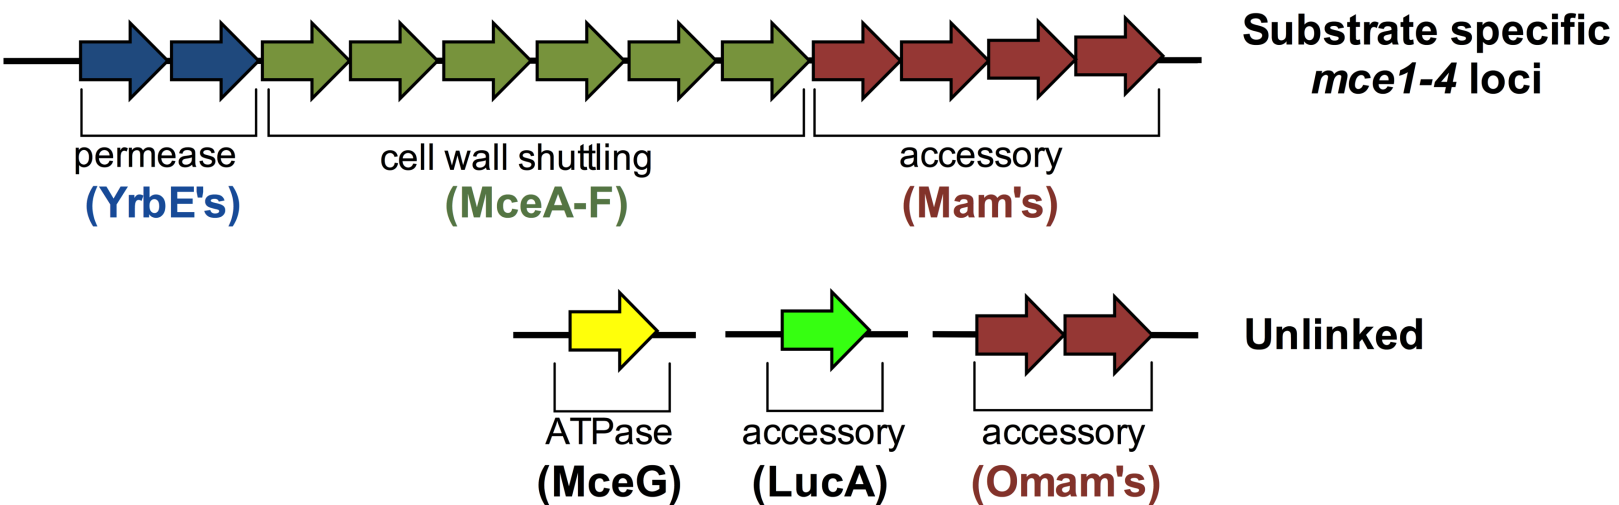



27 **Abstract**

28 Pathogenic bacteria have evolved highly specialized systems to extract essential nutrients  
29 from their hosts and *Mycobacterium tuberculosis* (Mtb) scavenges lipids (cholesterol and  
30 fatty acids) to maintain infection in mammals. While the uptake of cholesterol by Mtb is  
31 mediated by the Mce4 transporter, the route(s) of uptake of fatty acids remain unknown.  
32 Here, we demonstrate that an uncharacterized protein LucA, integrates the assimilation of  
33 both cholesterol and fatty acids in Mtb. LucA interacts with subunits of the Mce1 and Mce4  
34 complexes to coordinate the activities of these nutrient transporters. We also demonstrate  
35 that Mce1 functions as an important fatty acid transporter in Mtb and we determine that the  
36 integration of cholesterol and fatty acid transport by LucA is required for full bacterial  
37 virulence *in vivo*. These data establish that fatty acid and cholesterol assimilation are  
38 inexorably linked in Mtb and reveals a key role for LucA in coordinating both transport  
39 activities.

40

41

42

43

44

45

46

## 47 **Introduction**

48 *Mycobacterium tuberculosis* (Mtb), the causative agent of human tuberculosis (TB), is  
49 responsible for more than 1 million deaths each year and currently infects nearly ~1.5  
50 billion individuals. A hallmark of TB is that infected individuals rarely develop active TB  
51 disease and most infections (~90%) remain asymptomatic or latent. Mtb is exquisitely  
52 adapted to the human host and the bacterium's ability to metabolize host-derived lipids  
53 (fatty acids and cholesterol) aids in bacterial survival and persistence. Therefore  
54 elucidating the mechanisms involved in nutrient uptake and metabolism in Mtb will help us  
55 better understand the host-pathogen interactions and may identify new vulnerabilities for  
56 drug discovery.

57 Multiple lines of evidence indicate that host lipids (fatty acids and cholesterol) serve as  
58 critical carbon sources for Mtb during infection. Mtb propagated in mammalian tissues  
59 preferentially metabolizes fatty acids (Bloch and Segal, 1956) and studies using bacterial  
60 mutants have repeatedly demonstrated that lipid metabolism promotes Mtb survival during  
61 infection (Marrero et al., 2010; McKinney et al., 2000; Muñoz-Elías et al., 2006). Mtb also  
62 has the ability to metabolize cholesterol (Van der Geize et al., 2007) and utilization of this  
63 nutrient is critical for Mtb survival within macrophages (MΦs) (VanderVen et al., 2015) and  
64 in different *in vivo* infection models (Chang et al., 2007; Hu et al., 2010; Nesbitt et al.,  
65 2010; Pandey and Sasseti, 2008; Yam et al., 2009).

66 Mtb's remarkable capacity to assimilate and metabolize fatty acids is considered a  
67 defining characteristic of this pathogen. However, the mechanisms underlying fatty acid  
68 uptake in Mtb have remained undetermined. The mycolic acid-containing cell envelope of  
69 Mtb constitutes a unique barrier for the import of hydrophobic molecules and likely explains  
70 why the Mtb genome does not encode canonical lipid transporters typically found in other  
71 bacterial systems (Black et al., 1987; Theodoulou et al., 2016; van den Berg et al., 2004).  
72 Mtb imports cholesterol across the mycobacterial cell envelope via the multi-subunit

73 transporter termed Mce4 (Pandey and Sasseti, 2008), and the Mtb genome contains four  
74 total unlinked *mce* loci (*mce1-mce4*). While the functions of proteins encoded in the *mce1-*  
75 *mce3* loci are unknown; the similarities shared across the *mce1-4* loci suggest that these  
76 loci all encode transporters responsible for the assimilation of hydrophobic molecules.

77 Most of the genes required for Mtb growth on cholesterol as a sole carbon source have  
78 been mapped (Griffin et al., 2011) but, little is known about how Mtb utilizes cholesterol in  
79 the presence of other nutrients. Mtb can co-metabolize simple carbon substrates *in vitro*  
80 (de Carvalho et al., 2010) suggesting that the bacterium also may utilize fatty acids and  
81 cholesterol simultaneously and the bacterium likely encounters both of these substrates  
82 together *in vivo*. For example, during infection Mtb induces the formation of foamy MΦs  
83 (Peyron et al., 2008) and this process is thought to drive the accumulation of both fatty  
84 acids and cholesterol within Mtb infected lesions and MΦs (Kim et al., 2010). Additionally,  
85 during infection Mtb uses fatty acids to balance the assimilation of cholesterol-derived  
86 intermediates (Lee et al., 2013) suggesting that cholesterol and fatty acid utilization are  
87 integrated processes.

88 Here we performed a forward genetic screen to identify Mtb mutants defective in  
89 cholesterol utilization in the presence of fatty acids. We identified LucA, a protein of  
90 unknown function and determined that this protein is required for the intake of both fatty  
91 acids and cholesterol by Mtb during infection and in axenic culture. We renamed Rv3723  
92 as LucA (lipid uptake coordinator A). LucA facilitates fatty acid and cholesterol uptake in  
93 Mtb by stabilizing subunits of the Mce1 and Mce4 transporters. We also determined that  
94 the Mce1 complex transports fatty acids in Mtb and that LucA is required for full virulence  
95 *in vivo*. Together, these findings demonstrate that fatty acid and cholesterol import in Mtb  
96 is integrated via LucA and that coordination of these activities is necessary to support Mtb  
97 pathogenesis.

## 98 **Results**

### 99 **Identifying cholesterol utilization genes in Mtb**

100 Using a forward genetic screen we identified genes involved in cholesterol utilization  
101 when Mtb is grown in media containing a mixture of fatty acids and carbohydrates. Mtb  
102 lacking Icl1 (Mtb  $\Delta icl1$ ) fails to grow in rich media containing cholesterol. This growth  
103 inhibition is linked to the accumulation of one or more cholesterol-derived intermediates  
104 that accumulate when Icl1 is nonfunctional (Eoh and Rhee, 2014; Lee et al., 2013;  
105 VanderVen et al., 2015). We reasoned that mutations in the cholesterol utilization pathway  
106 would rescue the cholesterol-dependent growth inhibition of  $\Delta icl1$  Mtb (Figure S1A).  
107 Therefore, we isolated transposon rescue mutants in a  $\Delta icl1$  Mtb background that gained  
108 the ability to grow on media containing cholesterol. In total, 133 clones were isolated and  
109 mutations mapped to 19 separate genes (Table S1). The rescue phenotype was confirmed  
110 for 16 of the 19 mutants in liquid media containing cholesterol (Figure S1B).

111 9 of the 16 genes identified had been predicted to be required for growth of Mtb on  
112 cholesterol as a sole carbon source (Griffin et al., 2011). These include *rv1130/prpD* and  
113 *rv1131/prpC* (Table S1) that enable propionyl-CoA flux into the MCC and thus limits  
114 production of toxic MCC intermediates that accumulate in the absence of Icl1 (Eoh and  
115 Rhee, 2014; VanderVen et al., 2015). This screen also identified mutations in genes  
116 encoding cholesterol catabolic enzymes *rv3545c/cyp125*, *rv3568c/hsaC*, and  
117 *rv3570c/hsaA* (Capyk et al., 2009; Dresen et al., 2010; Yam et al., 2009). These mutations  
118 likely rescue growth by reducing the amount of propionyl-CoA released from cholesterol  
119 and are consistent with the observation that chemically inhibiting the PrpC or the HsaAB  
120 enzymes is sufficient to rescue growth of the  $\Delta icl1$  Mtb in cholesterol (VanderVen et al.,  
121 2015).

### 122 ***lucA* encodes a membrane protein involved in cholesterol metabolism**



123 17 sibling mutants carrying transposon insertions in the *lucA* gene ( $\Delta icl1$  Tn::*lucA*) were  
124 identified with the screen (Table S1). Orthologs of *lucA* are restricted to *Mycobacterium*  
125 spp., and this gene encodes an uncharacterized putative integral membrane protein with  
126 four predicted transmembrane domains. Previous genetic epistasis studies implicated  
127 LucA in cholesterol utilization *in vivo* (Joshi et al., 2006). We confirmed that the transposon  
128 insertion in the *lucA* gene is responsible for the growth rescue in the  $\Delta icl1$  background by  
129 complementation (Figure 1A). To ascertain LucA's subcellular localization LucA was fused  
130 to green fluorescent protein (LucA-GFP) and expressed in a wild type strain of Mtb that  
131 constitutively expresses mCherry. Confocal microscopy revealed a peripheral distribution  
132 for LucA-GFP, is consistent with a cell membrane or cell envelope localization (Figure S2).

### 133 **LucA facilitates cholesterol uptake and metabolism**

134 Given the potential role of LucA in cholesterol metabolism, we constructed LucA mutant  
135 in Mtb Erdman by allelic exchange for further analysis (Mtb  $\Delta lucA$ ) (Figure S3) and  
136 confirmed that *lucA* is required for the catabolic release of  $^{14}\text{CO}_2$  from [4- $^{14}\text{C}$ ]-cholesterol  
137 using radiorespirometry (VanderVen et al., 2015). This assay detected a 90% reduction in  
138 the amount of  $^{14}\text{CO}_2$  released from Mtb  $\Delta lucA$  relative to the wild type and the  
139 complemented strains (Figure 1B). The reduction in  $^{14}\text{CO}_2$  release was not due to a growth  
140 defect (Figure S4) and the percent  $^{14}\text{CO}_2$  released was normalized to bacterial biomass.

141 To determine the impact of LucA on cholesterol uptake in Mtb we quantified the rate of  
142 [4- $^{14}\text{C}$ ]-cholesterol uptake using an established assay (Pandey and Sassetti, 2008). We  
143 found that the  $\Delta lucA$  mutant assimilates 70% less cholesterol relative to the wild type and  
144 complemented controls (Figure 1C, Table S2, and Figure S5). The level of cholesterol  
145 uptake observed with  $\Delta lucA$  mutant was comparable to the amount of cholesterol  
146 assimilated by a Mce4 mutant ( $\Delta yrbE4A$ ) (Figure 1C and Table S2).

### 147 **The $\Delta lucA$ mutant is defective in cholesterol utilization during infection**

148 Analysis of the bacterial transcriptional responses during infection revealed a role for  
149 LucA in cholesterol utilization. Expression of KstR regulon genes were strongly down-  
150 regulated in the  $\Delta lucA$  mutant in comparison to the wild type and complemented strains  
151 (Figure 2, Table S3, and Table S4). KstR is a repressor that controls the expression of  
152 genes encoding enzymes that metabolize the side chain and A/B rings of cholesterol  
153 (Kendall et al., 2007). The KstR regulon is activated in a “feed forward” manner when KstR  
154 is de-repressed by binding to the early cholesterol degradation intermediate, 3-oxocholest-  
155 4-en-26-oyl-CoA (Ho et al., 2016) during infection (Rohde et al., 2012; Schnappinger et al.,  
156 2003). Thus, the down-regulation of the KstR regulon in the  $\Delta lucA$  mutant indicates a  
157 decrease in cholesterol uptake.

158 Mtb assimilates cholesterol-derived propionyl-CoA into central metabolism via the  
159 methyl-malonyl pathway (MMP) and the MCC and these genes are highly expressed when  
160 Mtb metabolizes cholesterol (Griffin et al., 2012; Savvi et al., 2008). We found that  
161 expression of the MMP and MCC genes were also down-regulated in the Mtb  $\Delta lucA$   
162 mutant (Figure 2). Cholesterol degradation in Mtb produces propionyl-CoA, which activates  
163 the *rv1130/prpD* promoter (Griffin et al., 2012; Masiewicz et al., 2012). To monitor  
164 cholesterol breakdown in Mtb during infection we constructed a reporter plasmid where the  
165 *rv1130/prpD* promoter controls GFP expression and mCherry is constitutively expressed  
166 (*prpD*::GFP *smc*::mCherry). We validated this reporter by determining that expression of  
167 GFP was induced >20-fold in wild type Mtb when the bacteria were grown in media  
168 containing cholesterol or propionate (Figure S6A and Figure S6B). Using this reporter we  
169 observed a ~75% reduction in GFP expression from the  $\Delta lucA$  mutant relative to the wild  
170 type and complement controls when the bacteria were grown in media containing  
171 cholesterol (Figure S6C). We also quantified GFP expression in the Mtb  $\Delta lucA$  mutant  
172 during infection in MΦs. Intracellular bacteria were isolated from the infected MΦs and  
173 bacterial GFP expression levels were determined by flow cytometry. This analysis

174 demonstrated a ~75% reduction in the GFP signal from the Mtb  $\Delta lucA$  mutant (Figure  
175 S6D) supporting the idea that the Mtb  $\Delta lucA$  mutant is defective in utilizing cholesterol  
176 during infection.

### 177 **The Mtb $\Delta lucA$ mutant does not assimilate fatty acids during infection**

178 Unexpectedly, the transcriptional response in the Mtb  $\Delta lucA$  mutant also revealed a  
179 gene expression signature consistent with a defect in fatty acid utilization (Table S3 and  
180 Table S5). For this, we focused on the Mtb genes induced in the bacteria during M $\Phi$   
181 infection and by palmitate, and observed that the majority of these genes were strongly  
182 down-regulated in the  $\Delta lucA$  mutant (Figure 2).

183 To verify the fatty acid utilization defect in the  $\Delta lucA$  mutant we quantified the uptake of  
184 fluorescent palmitate (Bodipy-C16) by the intracellular bacteria. Resting M $\Phi$ s were  
185 infected with wild type,  $\Delta lucA$  mutant, and complemented strains, all constitutively  
186 expressing mCherry. On day 3 of infection the M $\Phi$ s were pulsed with Bodipy-C16.  
187 Confocal analysis revealed that the wild type and the complemented bacteria accumulated  
188 intracellular Bodipy-C16 as visible punctate inclusions, while the  $\Delta lucA$  mutant did not  
189 (Figure 3A). To corroborate this finding, intracellular bacteria were isolated from pulse-  
190 labeled M $\Phi$ s and Bodipy-C16 assimilation by Mtb was quantified by flow-cytometry. This  
191 analysis revealed a 10-fold reduction in the amount of Bodipy-C16 assimilated by the Mtb  
192  $\Delta lucA$  mutant relative to the wild type and complemented strains (Figure 3B). There was  
193 minimal difference in bacterial colony forming units (CFU) at day 3 of these experiments  
194 indicating that the decreased levels of assimilated Bodipy-C16 were not due to a loss of  
195 bacterial viability (Figure S7).

196 It is possible that the  $\Delta lucA$  mutant traffics to lysosomal compartments in the M $\Phi$ ,  
197 which could potentially restrict access to Bodipy-C16. To rule this out lysosomes were  
198 pulse labeled with Alexa 647-dextran prior to infection. At day 3 of infection we determined  
199 that the  $\Delta lucA$  mutant did not colocalize with the Alexa 647-dextran-loaded lysosomes with

200 Pearson coefficient of correlation values of  $0.052 \pm 0.062$  (wild type),  $0.101 \pm 0.054$  ( $\Delta lucA$ ),  
201 and  $0.190 \pm 0.174$  (complement) (Figure S8).

202 During infection Mtb can sequester fatty acids as triacylglycerol (TAG) within cytosolic  
203 intracellular lipid inclusions (Li's) (Daniel et al., 2011). Therefore, the presence of Li's can  
204 serve as an indicator of fatty acid assimilation by Mtb during infection. To image  
205 intracellular Li's in Mtb we used the neutral lipid stain Bodipy-493/503 (Listenberger and  
206 Brown, 2007). Staining infected murine MΦs with Bodipy-493/503 revealed a punctate  
207 staining pattern inside the wild type and complemented strains while no staining was  
208 observed in the Mtb  $\Delta lucA$  mutant (Figure S9A). Additionally, Li's are also visible by  
209 transmission electron microscopy (Figure 3C) and only ~5% of the intracellular  $\Delta lucA$   
210 mutant cells had identifiable Li's, while 25% of the wild type and 35% of complemented  
211 bacteria had visible Li's during infection (Figure 3D).

212 The decrease in Li's within the  $\Delta lucA$  mutant could also be due to enhanced turnover of  
213 the intracellular Li's. To rule this possibility out, intracellular bacteria were treated with the  
214 broad-spectrum lipase inhibitor, tetrahydrolipstatin (THL), which can inhibit TAG turnover in  
215 Mtb (Baek et al., 2011). We predicted that if TAG were more efficiently degraded in the  
216 Mtb  $\Delta lucA$  mutant, THL treatment would restore the presence of intracellular Li's in the  
217 mutant. There was no increase in the levels of intracellular Li's in the Mtb  $\Delta lucA$  mutant  
218 following THL treatment (Figure S9B). These observations indicate that the Mtb  $\Delta lucA$   
219 mutant is unable to utilize both fatty acids and cholesterol during infection in MΦs.

## 220 **LucA facilitates fatty acid uptake**

221 We next quantified fatty acid metabolism and uptake in the Mtb  $\Delta lucA$  mutant using  
222 radiolabeled fatty acids. Fatty acid metabolism was measured by quantifying the oxidative  
223 release of  $^{14}\text{C-CO}_2$  from [ $^{14}\text{C(U)}$ ]-palmitate and [ $1\text{-}^{14}\text{C}$ ]-oleate by radiorespirometry. This  
224 assay detected a ~80% and ~95% reduction in the  $\Delta lucA$  mutant's ability to metabolize the  
225 [ $^{14}\text{C(U)}$ ]-palmitate and [ $1\text{-}^{14}\text{C}$ ]-oleate, respectively (Figure 3E and 3G).

226 Fatty acid uptake was quantified with [ $^{14}\text{C}(\text{U})$ ]-palmitate and [ $1\text{-}^{14}\text{C}$ ]-oleate as described  
227 (Forrellad et al., 2014). Relative to the wild type and complemented strains we observed a  
228 ~90% and ~95% reduction in the  $\Delta lucA$  mutant's ability to assimilate [ $^{14}\text{C}(\text{U})$ ]-palmitate and  
229 [ $1\text{-}^{14}\text{C}$ ]-oleate, respectively (Figure 3F, Figure 3H, and Figure S2). The  $^{14}\text{C}$ -fatty uptake  
230 rate was calculated (Figure S5) and normalized to biomass. Based on these results we  
231 conclude that deletion of LucA perturbs fatty acid uptake by the bacterium, which  
232 decreases the bacterium's ability to metabolize fatty acids.

### 233 **Mce1 is a fatty acid transporter**

234 The system(s) responsible for fatty acid import in Mtb have remained elusive. While the  
235  $\Delta lucA$  mutant is defective in fatty acid uptake, the LucA protein lacks any recognizable  
236 domains that would predict a transport function for the protein. We hypothesized that, in  
237 the absence of LucA, Mtb may up-regulate expression of an actual fatty acid transporter in  
238 attempt to compensate for the fatty acid uptake defect. Upon analysis, we observed that  
239 genes in the *mce1* loci are strongly induced in  $\Delta lucA$  mutant in MΦs (Figure 2). To test the  
240 hypothesis that Mce1 functions as a fatty acid transporter in Mtb, we generated a Mce1  
241 mutant by deleting the Mce1 permease Rv0167/YrbE1A subunit ( $\Delta yrbE1A$ ) and quantified  
242 fatty acid uptake and metabolism with this strain. The  $\Delta yrbE1A$  mutant displayed a ~70%  
243 and ~85% reduction in its ability to metabolize [ $^{14}\text{C}(\text{U})$ ]-palmitate and [ $1\text{-}^{14}\text{C}$ ]-oleate,  
244 respectively (Figures 3E, 3G, and S2). Relative to the wild type and complement strains  
245 we detected a ~80% and ~75% reduction in the  $\Delta yrbE1A$  mutant's ability to intake  
246 [ $^{14}\text{C}(\text{U})$ ]-palmitate and [ $1\text{-}^{14}\text{C}$ ]-oleate (Figure 3F and 3H). Notably,  $\Delta yrbE1A$  was able to  
247 transport and metabolize cholesterol to wild type levels (Figure S10). Lastly, a mutant  
248 lacking 8 genes of the *mce1* loci ( $\Delta mce1$ ) was defective in fatty acid uptake and  
249 metabolism, but had no detectable defect in cholesterol uptake or metabolism (Figure  
250 S11). Based on these results we conclude that the Mce1 complex functions as a dedicated  
251 fatty acid transporter in Mtb.

## 252 **LucA interacts with Mce1- and Mce4-associated proteins**

253 To shed light on the function of LucA we conducted a mycobacterial 2-hybrid screen to  
254 identify protein fragments that interact with LucA (Singh et al., 2006). For this, the F<sub>3</sub>  
255 domain of murine dihydrofolate reductase (mDHFR) was fused to the C-terminus of a full  
256 length LucA (LucA-F<sub>3</sub>) (Table S6). We co-expressed LucA-F<sub>3</sub> in *M. smegmatis* (Msm)  
257 along with a library (2x10<sup>6</sup>) of random Mtb protein fragments fused to the F<sub>1,2</sub> domain of  
258 mDHFR. Interactions between bait and prey fusions containing the split domains of  
259 mDHFR confer resistance to trimethoprim (TRIM). This screen identified 4 sibling clones  
260 which encode an in-frame N-terminal fragment (1-110 aa) of *rv3492c/mam4B* fused to the  
261 F<sub>1,2</sub> domain of mDHFR. Mam4B is encoded by a gene within the *mce4* loci (Figure 4A) and  
262 this protein is predicted to function as a subunit of the Mce4 cholesterol transport complex.  
263 Thus, we re-cloned Mam4B fused to the F<sub>1,2</sub> domain of mDHFR (Mam4B(TR)-F<sub>1,2</sub>) (1-75  
264 aa) and confirmed that co-expressing Mam4B(TR)-F<sub>1,2</sub> with LucA-F<sub>3</sub> in Msm conferred  
265 trimethoprim (TRIM) resistance (Figure 4B and Table S7). Co-expressing just the  
266 transmembrane domain of Mam4B fused to the F<sub>1,2</sub> domain of mDHFR (Mam4B(TM)-F<sub>1,2</sub>)  
267 (1-70 aa) conferred TRIM resistance (Figure 4B and Table S6) indicative of a biologically-  
268 significant interaction. The Mtb genome encodes additional homologs of Rv3492c/Mam4B  
269 that are associated with the Mce1 and Mce4 transporters (Figure 4A). To determine if  
270 these subunits also interact with LucA we generated F<sub>1,2</sub> fusions to Rv0177/Mam1C and  
271 Rv0199/OmamA and found that co-expression of these along with LucA-F<sub>3</sub> conferred  
272 TRIM resistance (Figure 4B, Table S6). These data indicate that LucA physically interacts  
273 with subunits of the Mce1 and Mce4 transporters suggesting that the LucA protein  
274 participates in the function of these complexes.

## 275 **LucA stabilizes subunits of the Mce1 and Mce4 complex.**

276 Recently, it was demonstrated that Rv0199/OmamA is required for cholesterol  
277 metabolism in Mtb (Perkowski et al., 2016). Given that LucA interacts with

278 Rv0199/OmamA and the related homologs Rv3492c/Mam4B and Rv0177/Mam1C we  
279 hypothesized that both the Mce1 and Mce4 transporters may also be destabilized in the  
280  $\Delta lucA$  mutant. To test this, Mtb was grown under the conditions used in the lipid uptake  
281 experiments. Gene expression analysis by qPCR confirmed that the *mce1* and *mce4*  
282 genes are expressed in the  $\Delta lucA$  mutant to equivalent levels relative to the wild type and  
283 complemented strains under the assay conditions (Figure S12). In contrast, analysis of  
284 whole cell lysates revealed that, at the protein level, the putative subunits of the Mce1  
285 complex (including Mce1A, Mce1D, Mce1E) were completely degraded in the  $\Delta lucA$   
286 mutant (Figure 4C and Figure 4D). Unfortunately, thus far we have been unable to raise  
287 antibodies specific to the analogous Mce4 subunits to determine if they to are degraded.

288 It is thought that MceG/Rv0655 functions as a common ATPase to hydrolyze ATP and  
289 facilitate uptake through the Mce1 and Mce4 transporters (Joshi et al., 2006; Mohn et al.,  
290 2008; Pandey and Sasseti, 2008). Given that the stability of MceG requires co-expression  
291 of the Mce1 and Mce4 permease components (Joshi et al., 2006) we monitored MceG  
292 protein levels and observed a 30% decrease in amount of MceG in the  $\Delta lucA$  mutant  
293 (Figure 4D). The rate of synthesis of Mce subunit proteins can exceed the rates of  
294 degradation (Perkowski et al., 2016) and this can mask protein instability. We therefore  
295 used chloramphenicol to suppress protein synthesis and under this condition the amount  
296 of MceG protein decreased by 75% in the  $\Delta lucA$  mutant (Figure 4D). These results  
297 demonstrate that, in the absence of LucA, not only subunits of the Mce1 transporter  
298 complex, but also shared MceG ATPase, are degraded. These data provide an  
299 explanation for the linked defect in both fatty acid and cholesterol uptake observed in the  
300  $\Delta lucA$  mutant.

### 301 **Substrate binding and translocation by Mce4 are dissociable events**

302 Our data indicates that the LucA protein interacts with Rv3492c/Mam4B, a putative  
303 subunit of the Mce4 complex and we predict that this protein is required for cholesterol

304 import. To test this hypothesis, Rv3492c/Mam4B was deleted ( $\Delta mam4B$ ) and we  
305 quantified the rate of [4-<sup>14</sup>C]-cholesterol uptake in this mutant. We found that the level of  
306 association of [4-<sup>14</sup>C]-cholesterol with the  $\Delta mam4B$  mutant was comparable to wild type  
307 bacteria (Figure S13A). However, analysis of cholesterol breakdown in the  $\Delta mam4B$   
308 mutant revealed an 80% reduction in [4-<sup>14</sup>C]-cholesterol metabolism (Figure S13B).  
309 Additionally, the  $\Delta mam4B$  had no defect in fatty acid uptake or metabolism (Figures S13C-  
310 E and D-F). Together these data indicate that Rv3492c/Mam4B is required to complete the  
311 process of Mce4-mediated cholesterol internalization in Mtb.

### 312 **LucA contributes to the *in vivo* fitness of Mtb**

313 These data indicate that LucA is involved in the utilization of two critical host-derived  
314 lipid substrates. It is known that deletion of one or both of the Mce1 and Mce4 transporters  
315 leads to decreased survival of the pathogen in mouse model infection (Joshi et al., 2006)  
316 and we predict that both of these transporters would be nonfunctional in the  $\Delta lucA$  mutant.  
317 In human MΦs the  $\Delta lucA$  mutant displayed a growth lag that culminates in a 10-fold  
318 difference in bacterial counts compared to wild type and complemented strains over a 7-  
319 day infection period (Figure 5A). A similar phenotype was observed in the resting murine  
320 MΦs where the  $\Delta lucA$  mutant replicated poorly over a 10-day infection period (Figure 5B).  
321 In both human and murine MΦs the final CFU counts for the  $\Delta lucA$  mutant remained close  
322 to initial inoculum levels. These data are consistent with the hypothesis that Mtb requires  
323 LucA to sustain maximal growth on cholesterol and/or fatty acid substrates in MΦs.

324 In the lung tissues of C57BL/6J mice, the  $\Delta lucA$  mutant also demonstrated a fitness  
325 defect and did not attain levels of bacterial burden comparable to either the wild type or  
326 complemented strains. At day 14 post-infection 10-fold fewer CFU's of the  $\Delta lucA$  mutant  
327 were recovered relative to wild type and the complemented strains. During the remainder  
328 of the 56-day infection period, growth of the  $\Delta lucA$  mutant remained restricted, leading to  
329 3- to 5-fold reduction in viable  $\Delta lucA$  bacteria (Figure 5C). The  $\Delta lucA$  mutant also induced



330 less pulmonary pathology throughout the entire course of infection (Figure 5D).  
331 Complementation almost completely restored pathogenicity and lung tissue pathology  
332 confirming the specificity of the mutant phenotype to the *lucA* gene.

### 333 **Discussion**

334 While there is general agreement as to the role of Mce4 in cholesterol uptake in Mtb,  
335 the process of fatty acid assimilation by the bacterium has remained enigmatic. These data  
336 shed new light on the coordination of fatty acid and cholesterol import and reveal that a  
337 network of proteins associates with the Mce1 and Mce4 transporters to integrate the  
338 uptake of both fatty acids and cholesterol.

339 Using an unbiased forward genetic screen we discovered that transposon insertions in  
340 the *LucA* gene rescue cholesterol toxicity in an Mtb strain that lacks  $\Delta icl1$ . Subsequent  
341 analysis confirmed that mutation of *LucA* ( $\Delta lucA$ ) has a profound impact on cholesterol  
342 uptake (Figure 1B and Figure 1C), and that this cholesterol uptake defect confers growth  
343 rescue in the  $\Delta icl1$  Tn::*lucA* double mutant.

344 Transcriptional profiling revealed that genes normally activated by cholesterol are  
345 down-regulated in the  $\Delta lucA$  mutant during infection in MΦs. This is consistent with a  
346 defect in cholesterol uptake in this mutant (Figures 2, S3, and S4). We were surprised to  
347 discover that the  $\Delta lucA$  mutant also produces a gene expression signature indicative of a  
348 fatty acid metabolism defect (Figure 2, S3, and S5). Although the functions for many of  
349 these “fatty acid-induced” genes are unknown their expression pattern serves as a reliable  
350 indicator of a fatty acid uptake defect in Mtb. The majority of the 20 most highly-expressed  
351 genes in the  $\Delta lucA$  during infection in MΦs map to the *mce1* loci (Figure 2, Table S3). Up-  
352 regulation of genes encoding the Mce1 fatty acid transporter in the  $\Delta lucA$  mutant during  
353 infection likely reflects an attempt by the bacterium to compensate for the absence of fatty  
354 acids that normally fuels Mtb’s metabolism. The mechanism that controls expression of the  
355 *mce1* loci in response to fatty acid depletion is unknown but we hypothesize that Mtb has

356 an ability to sense metabolite pools to control expression of the Mce1 fatty acid transporter  
357 complex.

358 The Mtb cell envelope constitutes formidable barrier to the transport of any hydrophobic  
359 molecule. Actinomycetal bacteria with mycolic acid-containing cell walls that are capable of  
360 metabolizing cholesterol use the Mce4 complex to import the sterol (Mohn et al., 2008;  
361 Pandey and Sassetti, 2008; Perkowski et al., 2016) and this has lead to the idea that all  
362 four of the Mce complexes transport hydrophobic molecules across the Mtb cell wall.  
363 Various studies have linked Mce1 to Mtb virulence (Gioffre et al., 2005; Joshi et al., 2006;  
364 Shimono et al., 2003) but the function of the Mce1 complex was hitherto unknown. It has  
365 been reported that inactivating Mce1 in Mtb induces a lipid homeostasis defect and the  
366 accumulation of free mycolic acids in the Mtb cell wall (Cantrell et al., 2013; Forrellad et al.,  
367 2014). Based on these observations it was hypothesized that the Mce1 may transport fatty  
368 acids and/or mycolic acids across the cell wall/membrane of Mtb and it was reported that  
369 Mce1 mutant in Mtb displayed a minor defect in fatty acid uptake (Forrellad et al., 2014).  
370 We used assays comparable to those previously described and detected major  
371 perturbations in fatty acid assimilation in our Mce1 mutants (Figure 3 and Figure S11). We  
372 cannot fully explain the discrepancy between these findings but we have noticed that  
373 spontaneous mutants of Mtb unable to produce phthiocerol dimycocerosate (PDIM)  
374 assimilate less fatty acid compared to PDIM positive strains. Our work was conducted in a  
375 PDIM positive strain of Mtb Erdman, which unmask defects associated with a Mce1  
376 deletion. Studies with *Mycobacterium leprae* (Mlep) are consistent with the interpretation  
377 that Mce1 functions as a mycobacterial fatty acid transporter. The Mlep genome contains a  
378 single *mce* loci which is most similar to the *mce1* operon found in Mtb and Mlep is fully  
379 capable of importing and metabolizing palmitate following recovery from animal tissues  
380 (Franzblau, 1988). The Mlep genome also encodes homolog of *lucA* (ml2337) suggesting  
381 that LucA is central for Mce1 function. The finding that LucA facilitates fatty acid and

382 cholesterol import and stabilizes components of the Mce1 transporter provides additional  
383 evidence that Mce1 functions as a fatty acid transporter. Given that the Mce4 and Mce1  
384 transporters demonstrates specificity for cholesterol and fatty acids, respectively (Figures  
385 3E-H, S10, S11, S13) the fatty acid uptake defect in the  $\Delta lucA$  mutant is likely a  
386 consequence of the degradation of Mce1 components (Figure 4D).

387 The *mce1-4* loci make up four separate operons in the Mtb genome and each operon  
388 encodes the putative protein subunits that likely comprise the individual Mce transporters.  
389 It is thought that each Mce transporter is substrate-specific and the individual subunits are  
390 predicted to perform discrete roles. Specifically, the *mce4* operon encodes two putative  
391 permease subunits (YrbE4A and YrbE4B), six cell wall associated Mce proteins (Mce4A-  
392 Mce4F), and two accessory subunits (Mam4A and Mam4B). We found that LucA interacts  
393 with Mam4B (Figure 4B and S6) and that Mam4B is required for the metabolism of  
394 cholesterol, however, the mutant lacking Mam4B is still capable of binding cholesterol  
395 (Figure S13). Based on this observation we propose that Mce4 imports cholesterol via a  
396 two-step process that involves cholesterol binding/shuttling across the cell wall followed by  
397 the final translocation through the cytoplasmic membrane delivering cholesterol into the  
398 cytosol (Figure S14). The accessory and permease subunits may participate in the final  
399 translocation of cholesterol across the cytoplasmic membrane while the Mce proteins likely  
400 participate in the binding/shuttling of cholesterol across the Mtb cell envelope.  
401 Binding/shuttling of lipids across the Mtb cell envelope may be analogous to what has  
402 been proposed for lipid trafficking by Mce proteins across the periplasm of gram-negative  
403 bacteria (Malinverni and Silhavy, 2009; Nakayama and Zhang-Akiyama, 2017; Thong et  
404 al., 2016). This two-step mechanism of nutrient uptake may be a generalizable mechanism  
405 for all Mce transporters. Additional support for the two-step model comes from our  
406 observation that the Mce proteins (Mce1A, Mce1D, and Mce1E) are degraded in the  $\Delta lucA$   
407 mutant and this strain is unable to bind/shuttle fatty acids across the Mtb cell envelope

408 (Figure 4D). Lastly, we can detect a residual level of fatty acid and cholesterol uptake and  
409 metabolism in mutants lacking Mce1 and Mce4, respectively. It is very likely that  
410 compensatory systems function to import these lipids in the absence of Mce1 and Mce4  
411 and we are currently testing this hypothesis.

412 Recently it was reported that orphaned mce associated protein Rv0199/OmamA  
413 facilitates cholesterol utilization in Mtb and stabilizes the Mce1 complex (Perkowski et al.,  
414 2016). We also found that LucA stabilizes subunits of the Mce transporters and interacts  
415 with Rv0199/OmamA, Rv0177/Mam1C and Rv3492/Mam4A (Figure 4B). This suggests  
416 that LucA is recruited to the Mce1 and Mce4 complexes via interactions with these  
417 accessory subunits to stabilize or assemble the transporters. Additionally, the putative  
418 ATPase, MceG/Rv0655 facilitates cholesterol uptake in Mtb (Pandey and Sassetti, 2008)  
419 and the stability of MceG increases when it is co-expressed with various YrbE permease  
420 proteins in Msm (Joshi et al., 2006). We found that the MceG protein is destabilized in the  
421  $\Delta lucA$  mutant, which could explain the cholesterol uptake defect in this mutant (Figure 4D).  
422 Homology searches based on 3-dimensional structures identified a putative protease  
423 inhibitor domain within the N-terminus of LucA (Kelley et al., 2015). We hypothesize that  
424 LucA may mediate local inactivation of a protease to maintain the integrity of the  
425 transporter complex. Regulating activity of the transport complexes through proteolysis  
426 would be a mechanism to rapidly halt nutrient uptake through the Mce transporters,  
427 however such a suggestion will require more research.

428 During growth in the presence of cholesterol Mtb shunts cholesterol-derived  
429 methylmalonyl-CoA (originating from propionyl-CoA) towards the increased synthesis of  
430 methyl-branched, cell wall polyketide lipids (Griffin et al., 2012; Jain et al., 2007; Yang et  
431 al., 2009). This metabolic shunting requires that sufficient fatty acid derived acyl-AMP  
432 primers are available to support biosynthesis of polyketide lipids (Quadri, 2014). When  
433 excess fatty acids are supplied to infected MΦs, Mtb can enhance the flux of propionyl-

434 CoA into polyketide lipids such as PDIM during infection (Lee et al., 2013). It would be  
435 advantageous for Mtb to coordinate fatty acid assimilation to maintain the acyl-AMP pools  
436 required for efficient synthesis of methyl-branched lipids. Thus, coordination of cholesterol  
437 and fatty acid uptake by LucA could ensure that balanced levels of these nutrients are  
438 maintained for optimized metabolism.

439 The central carbon and lipid metabolic pathways of Mtb have emerged as potential drug  
440 targets (Rhee et al., 2011; VanderVen et al., 2015), therefore understanding the  
441 bottlenecks or weaknesses in these pathways will assist TB drug discovery. Additionally,  
442 the flux of fatty acids into TAG and central metabolism contributes to drug tolerance in Mtb  
443 (Baek et al., 2011), a phenotype that is further enhanced by immune pressure during *in*  
444 *vivo* infection (Liu et al., 2016). Targeting the specialized lipid metabolic pathways in Mtb  
445 that are involved in fatty acid and cholesterol utilization could be a viable strategy for the  
446 development of new drugs that reduce Mtb drug tolerance and augment current TB drug  
447 regimens. Our data have defined new participants in the complex processes of fatty acid  
448 and cholesterol assimilation by Mtb. A better understanding of the functional integration of  
449 Mtb's specialized metabolic pathways is required to acquire a fuller appreciation of Mtb  
450 pathogenesis.

451

## 452 **Author Contributions**

453 Conceptualization, E.V.N. and B.C.V.; Methodology, E.V.N., and B.C.V.; Formal Analysis,  
454 E.V.N. and B.C.V.; Investigation, E.V.N., C.R.M., T.L., N.S., W.L., S.C., K.M.W., B.C.V.;  
455 Writing – Original Draft, E.V.N. and B.C.V.; Writing – Review & Editing, E.V.N., B.C.V. and  
456 D.G.R.; Visualization, E.V.N. and B.C.V.; Funding Acquisition, D.G.R. and B.C.V.

457

## 458 **Acknowledgements**

459 We thank Linda Bennett for excellent technical support, Robert Abramovitch, Shumin Tan,  
460 John Helmann, and Lu Huang for productive discussions, Maria Podinovskaia for  
461 assistance with imaging, Yancheng Liu for help with library construction for M-PFC. We  
462 also thank Adrie Steyn for the generous gift of the M-PFC vectors, Martin Pavelka for the  
463 aacC4 apramycin resistance cassette, and Christopher Sasseti for the Mce1 antibodies.  
464 This work was supported by the NIH grants (AI099569 and AI119122) to BCV and  
465 (AI080651) to DGR.  
466

- 467 Abramovitch, R.B., Rohde, K.H., Hsu, F.-F., and Russell, D.G. (2011). aprABC: a Mycobacterium  
468 tuberculosis complex-specific locus that modulates pH-driven adaptation to the macrophage  
469 phagosome. *Molecular microbiology* 80, 678-694.
- 470 Baek, S.H., Li, A.H., and Sasseti, C.M. (2011). Metabolic regulation of mycobacterial growth and  
471 antibiotic sensitivity. *PLoS biology* 9, e1001065.
- 472 Black, P.N., Said, B., Ghosn, C.R., Beach, J.V., and Nunn, W.D. (1987). Purification and  
473 characterization of an outer membrane-bound protein involved in long-chain fatty acid  
474 transport in *Escherichia coli*. *The Journal of biological chemistry* 262, 1412-1419.
- 475 Bloch, H., and Segal, W. (1956). Biochemical differentiation of *Mycobacterium tuberculosis*  
476 grown in vivo and in vitro. *Journal of bacteriology* 72, 132-141.
- 477 Cantrell, S.A., Leavell, M.D., Marjanovic, O., Iavarone, A.T., Leary, J.A., and Riley, L.W. (2013).  
478 Free mycolic acid accumulation in the cell wall of the mce1 operon mutant strain of  
479 *Mycobacterium tuberculosis*. *Journal of microbiology (Seoul, Korea)* 51, 619-626.
- 480 Capyk, J.K., Kalscheuer, R., Stewart, G.R., Liu, J., Kwon, H., Zhao, R., Okamoto, S., Jacobs, W.R., Jr.,  
481 Eltis, L.D., and Mohn, W.W. (2009). Mycobacterial cytochrome p450 125 (cyp125) catalyzes  
482 the terminal hydroxylation of c27 steroids. *The Journal of biological chemistry* 284, 35534-  
483 35542.
- 484 Chang, J.C., Harik, N.S., Liao, R.P., and Sherman, D.R. (2007). Identification of Mycobacterial  
485 Genes That Alter Growth and Pathology in Macrophages and in Mice. *Journal of Infectious*  
486 *Diseases* 196, 788-795.
- 487 Costes, S.V., Daelemans, D., Cho, E.H., Dobbin, Z., Pavlakis, G., and Lockett, S. (2004). Automatic  
488 and quantitative measurement of protein-protein colocalization in live cells. *Biophysical*  
489 *journal* 86, 3993-4003.
- 490 Daniel, J., Maamar, H., Deb, C., Sirakova, T.D., and Kolattukudy, P.E. (2011). *Mycobacterium*  
491 *tuberculosis* uses host triacylglycerol to accumulate lipid droplets and acquires a dormancy-  
492 like phenotype in lipid-loaded macrophages. *PLoS pathogens* 7, e1002093.
- 493 de Carvalho, L.P., Fischer, S.M., Marrero, J., Nathan, C., Ehrst, S., and Rhee, K.Y. (2010).  
494 Metabolomics of *Mycobacterium tuberculosis* reveals compartmentalized co-catabolism of  
495 carbon substrates. *Chemistry & biology* 17, 1122-1131.
- 496 Dresen, C., Lin, L.Y., D'Angelo, I., Tocheva, E.I., Strynadka, N., and Eltis, L.D. (2010). A flavin-  
497 dependent monooxygenase from *Mycobacterium tuberculosis* involved in cholesterol  
498 catabolism. *The Journal of biological chemistry* 285, 22264-22275.
- 499 Eoh, H., and Rhee, K.Y. (2014). Methylcitrate cycle defines the bactericidal essentiality of  
500 isocitrate lyase for survival of *Mycobacterium tuberculosis* on fatty acids. *Proceedings of the*  
501 *National Academy of Sciences of the United States of America* 111, 4976-4981.
- 502 Feltcher, M.E., Gunawardena, H.P., Zulauf, K.E., Malik, S., Griffin, J.E., Sasseti, C.M., Chen, X., and  
503 Braunstein, M. (2015). Label-free Quantitative Proteomics Reveals a Role for the  
504 *Mycobacterium tuberculosis* SecA2 Pathway in Exporting Solute Binding Proteins and Mce  
505 Transporters to the Cell Wall. *Molecular & cellular proteomics : MCP* 14, 1501-1516.
- 506 Forrellad, M.A., McNeil, M., Santangelo Mde, L., Blanco, F.C., Garcia, E., Klepp, L.I., Huff, J.,  
507 Niederweis, M., Jackson, M., and Bigi, F. (2014). Role of the Mce1 transporter in the lipid  
508 homeostasis of *Mycobacterium tuberculosis*. *Tuberculosis (Edinburgh, Scotland)* 94, 170-177.
- 509 Franzblau, S.G. (1988). Oxidation of palmitic acid by *Mycobacterium leprae* in an axenic  
510 medium. *Journal of clinical microbiology* 26, 18-21.
- 511 Gioffre, A., Infante, E., Aguilar, D., Santangelo, M.P., Klepp, L., Amadio, A., Meikle, V.,  
512 Etchehoury, I., Romano, M.I., Cataldi, A., *et al.* (2005). Mutation in mce operons attenuates  
513 *Mycobacterium tuberculosis* virulence. *Microbes and infection* 7, 325-334.
- 514 Griffin, J.E., Gawronski, J.D., DeJesus, M.A., Ioerger, T.R., Akerley, B.J., and Sasseti, C.M. (2011).  
515 High-Resolution Phenotypic Profiling Defines Genes Essential for Mycobacterial Growth and  
516 Cholesterol Catabolism. *PLoS pathogens* 7.

517 Griffin, J.E., Pandey, A.K., Gilmore, S.A., Mizrahi, V., McKinney, J.D., Bertozzi, C.R., and Sasseti,  
518 C.M. (2012). Cholesterol catabolism by *Mycobacterium tuberculosis* requires transcriptional  
519 and metabolic adaptations. *Chemistry & biology* *19*, 218-227.

520 Ho, N.A., Dawes, S.S., Crowe, A.M., Casabon, I., Gao, C., Kendall, S.L., Baker, E.N., Eltis, L.D., and  
521 Lott, J.S. (2016). The Structure of the Transcriptional Repressor KstR in Complex with CoA  
522 Thioester Cholesterol Metabolites Sheds Light on the Regulation of Cholesterol Catabolism in  
523 *Mycobacterium tuberculosis*. *The Journal of biological chemistry* *291*, 7256-7266.

524 Hu, Y., van der Geize, R., Besra, G.S., Gurcha, S.S., Liu, A., Rohde, M., Singh, M., and Coates, A.  
525 (2010). 3-Ketosteroid 9 $\alpha$ -hydroxylase is an essential factor in the pathogenesis of  
526 *Mycobacterium tuberculosis*. *Molecular microbiology* *75*, 107-121.

527 Jain, M., Petzold, C.J., Schelle, M.W., Leavell, M.D., Mougous, J.D., Bertozzi, C.R., Leary, J.A., and  
528 Cox, J.S. (2007). Lipidomics reveals control of *Mycobacterium tuberculosis* virulence lipids via  
529 metabolic coupling. *Proceedings of the National Academy of Sciences* *104*, 5133-5138.

530 Joshi, S.M., Pandey, A.K., Capite, N., Fortune, S.M., Rubin, E.J., and Sasseti, C.M. (2006).  
531 Characterization of mycobacterial virulence genes through genetic interaction mapping.  
532 *Proceedings of the National Academy of Sciences* *103*, 11760-11765.

533 Kelley, L.A., Mezulis, S., Yates, C.M., Wass, M.N., and Sternberg, M.J. (2015). The Phyre2 web  
534 portal for protein modeling, prediction and analysis. *10*, 845-858.

535 Kendall, S.L., Withers, M., Soffair, C.N., Moreland, N.J., Gurcha, S., Sidders, B., Frita, R., Ten  
536 Bokum, A., Besra, G.S., Lott, J.S., *et al.* (2007). A highly conserved transcriptional repressor  
537 controls a large regulon involved in lipid degradation in *Mycobacterium smegmatis* and  
538 *Mycobacterium tuberculosis*. *Molecular microbiology* *65*, 684-699.

539 Kim, M.J., Wainwright, H.C., Locketz, M., Bekker, L.G., Walther, G.B., Dittrich, C., Visser, A.,  
540 Wang, W., Hsu, F.F., Wiehart, U., *et al.* (2010). Caseation of human tuberculosis granulomas  
541 correlates with elevated host lipid metabolism. *EMBO molecular medicine* *2*, 258-274.

542 Lee, W., VanderVen, B.C., Fahey, R.J., and Russell, D.G. (2013). Intracellular *Mycobacterium*  
543 *tuberculosis* exploits host-derived fatty acids to limit metabolic stress. *The Journal of*  
544 *biological chemistry* *288*, 6788-6800.

545 Listenberger, L.L., and Brown, D.A. (2007). Fluorescent detection of lipid droplets and  
546 associated proteins. *Current protocols in cell biology / editorial board, Juan S Bonifacino [et*  
547 *al] Chapter 24, Unit 24.22.*

548 Liu, Y., Tan, S., Huang, L., Abramovitch, R.B., Rohde, K.H., Zimmerman, M.D., Chen, C., Dartois,  
549 V., VanderVen, B.C., and Russell, D.G. (2016). Immune activation of the host cell induces drug  
550 tolerance in *Mycobacterium tuberculosis* both in vitro and in vivo. *J Exp Med* *213*, 809-825.

551 Malinverni, J.C., and Silhavy, T.J. (2009). An ABC transport system that maintains lipid  
552 asymmetry in the gram-negative outer membrane. *Proceedings of the National Academy of*  
553 *Sciences of the United States of America* *106*, 8009-8014.

554 Mann, F.M., VanderVen, B.C., and Peters, R.J. (2011). Magnesium depletion triggers production  
555 of an immune modulating diterpenoid in *Mycobacterium tuberculosis*. *Molecular*  
556 *microbiology* *79*, 1594-1601.

557 Marrero, J., Rhee, K.Y., Schnappinger, D., Pethe, K., and Ehrt, S. (2010). Gluconeogenic carbon  
558 flow of tricarboxylic acid cycle intermediates is critical for *Mycobacterium tuberculosis* to  
559 establish and maintain infection. *Proceedings of the National Academy of Sciences of the*  
560 *United States of America* *107*, 9819-9824.

561 Masiewicz, P., Brzostek, A., Wolanski, M., Dziadek, J., and Zakrzewska-Czerwinska, J. (2012). A  
562 novel role of the PrpR as a transcription factor involved in the regulation of methylcitrate  
563 pathway in *Mycobacterium tuberculosis*. *PloS one* *7*, e43651.

564 McKinney, J.D., zu Bentrup, K.H., Munoz-Elias, E.J., Miczak, A., Chen, B., Chan, W.-T., Swenson,  
565 D., Sacchetti, J.C., Jacobs, W.R., and Russell, D.G. (2000). Persistence of *Mycobacterium*



566 tuberculosis in macrophages and mice requires the glyoxylate shunt enzyme isocitrate lyase.  
567 *Nature* *406*, 735-738.

568 Mohn, W.W., van der Geize, R., Stewart, G.R., Okamoto, S., Liu, J., Dijkhuizen, L., and Eltis, L.D.  
569 (2008). The actinobacterial *mce4* locus encodes a steroid transporter. *The Journal of*  
570 *biological chemistry* *283*, 35368-35374.

571 Muñoz-Elías, E.J., Upton, A.M., Cherian, J., and McKinney, J.D. (2006). Role of the methylcitrate  
572 cycle in *Mycobacterium tuberculosis* metabolism, intracellular growth, and virulence.  
573 *Molecular microbiology* *60*, 1109-1122.

574 Nakayama, T., and Zhang-Akiyama, Q.M. (2017). *pqiABC* and *yebST*, Putative *mce* Operons of  
575 *Escherichia coli*, Encode Transport Pathways and Contribute to Membrane Integrity. *Journal*  
576 *of bacteriology* *199*.

577 Nesbitt, N.M., Yang, X., Fontan, P., Kolesnikova, I., Smith, I., Sampson, N.S., and Dubnau, E.  
578 (2010). A Thiolase of *Mycobacterium tuberculosis* Is Required for Virulence and Production of  
579 Androstenedione and Androstadienedione from Cholesterol. *Infect Immun* *78*, 275-282.

580 Pandey, A.K., and Sasseti, C.M. (2008). Mycobacterial persistence requires the utilization of  
581 host cholesterol. *Proceedings of the National Academy of Sciences* *105*, 4376-4380.

582 Perkowski, E.F., Miller, B.K., McCann, J.R., Sullivan, J.T., Malik, S., Allen, I.C., Godfrey, V., Hayden,  
583 J.D., and Braunstein, M. (2016). An orphaned *Mce*-associated membrane protein of  
584 *Mycobacterium tuberculosis* is a virulence factor that stabilizes *Mce* transporters. *Molecular*  
585 *microbiology* *100*, 90-107.

586 Peyron, P., Vaubourgeix, J., Poquet, Y., Levillain, F., Botanch, C., Bardou, F., Daffe, M., Emile, J.F.,  
587 Marchou, B., Cardona, P.J., *et al.* (2008). Foamy macrophages from tuberculous patients'  
588 granulomas constitute a nutrient-rich reservoir for *M. tuberculosis* persistence. *PLoS*  
589 *pathogens* *4*, e1000204.

590 Podinovskaia, M., Lee, W., Caldwell, S., and Russell, D.G. (2013). Infection of macrophages with  
591 *Mycobacterium tuberculosis* induces global modifications to phagosomal function. *Cellular*  
592 *microbiology* *15*, 843-859.

593 Prod'homme, G., Lagier, B., Pelicic, V., Hance, A.J., Gicquel, B., and Guilhot, C. (1998). A reliable  
594 amplification technique for the characterization of genomic DNA sequences flanking insertion  
595 sequences. *FEMS microbiology letters* *158*, 75-81.

596 Quadri, L.E. (2014). Biosynthesis of mycobacterial lipids by polyketide synthases and beyond.  
597 *Critical reviews in biochemistry and molecular biology* *49*, 179-211.

598 Rhee, K.Y., de Carvalho, L.P., Bryk, R., Ehrt, S., Marrero, J., Park, S.W., Schnappinger, D.,  
599 Venugopal, A., and Nathan, C. (2011). Central carbon metabolism in *Mycobacterium*  
600 *tuberculosis*: an unexpected frontier. *Trends in microbiology* *19*, 307-314.

601 Rohde, K.H., Abramovitch, R.B., and Russell, D.G. (2007). *Mycobacterium tuberculosis* invasion  
602 of macrophages: linking bacterial gene expression to environmental cues. *Cell host & microbe*  
603 *2*, 352-364.

604 Rohde, K.H., Veiga, D.F., Caldwell, S., Balazsi, G., and Russell, D.G. (2012). Linking the  
605 transcriptional profiles and the physiological states of *Mycobacterium tuberculosis* during an  
606 extended intracellular infection. *PLoS pathogens* *8*.

607 Savvi, S., Warner, D.F., Kana, B.D., McKinney, J.D., Mizrahi, V., and Dawes, S.S. (2008).  
608 Functional Characterization of a Vitamin B12-Dependent Methylmalonyl Pathway in  
609 *Mycobacterium tuberculosis*: Implications for Propionate Metabolism during Growth on Fatty  
610 Acids. *J Bacteriol* *190*, 3886-3895.

611 Schnappinger, D., Ehrt, S., Voskuil, M.I., Liu, Y., Mangan, J.A., Monahan, I.M., Dolganov, G., Efron,  
612 B., Butcher, P.D., Nathan, C., *et al.* (2003). Transcriptional Adaptation of *Mycobacterium*  
613 *tuberculosis* within Macrophages: Insights into the Phagosomal Environment. *The Journal of*  
614 *Experimental Medicine* *198*, 693-704.

615 Shimono, N., Morici, L., Casali, N., Cantrell, S., Sidders, B., Ehrt, S., and Riley, L.W. (2003).  
616 Hypervirulent mutant of *Mycobacterium tuberculosis* resulting from disruption of the *mce1*  
617 operon. *Proceedings of the National Academy of Sciences of the United States of America* *100*,  
618 15918-15923.

619 Singh, A., Mai, D., Kumar, A., and Steyn, A.J. (2006). Dissecting virulence pathways of  
620 *Mycobacterium tuberculosis* through protein-protein association. *Proceedings of the National*  
621 *Academy of Sciences of the United States of America* *103*, 11346-11351.

622 Sukumar, N., Tan, S., Aldridge, B.B., and Russell, D.G. (2014). Exploitation of *Mycobacterium*  
623 *tuberculosis* reporter strains to probe the impact of vaccination at sites of infection. *PLoS*  
624 *pathogens* *10*, e1004394.

625 Theodoulou, F.L., Carrier, D.J., Schaedler, T.A., Baldwin, S.A., and Baker, A. (2016). How to  
626 move an amphipathic molecule across a lipid bilayer: different mechanisms for different ABC  
627 transporters? *Biochemical Society transactions* *44*, 774-782.

628 Thong, S., Ercan, B., Torta, F., Fong, Z.Y., Wong, H.Y., Wenk, M.R., and Chng, S.S. (2016). Defining  
629 key roles for auxiliary proteins in an ABC transporter that maintains bacterial outer  
630 membrane lipid asymmetry. *5*.

631 van den Berg, B., Black, P.N., Clemons, W.M., Jr., and Rapoport, T.A. (2004). Crystal structure of  
632 the long-chain fatty acid transporter FadL. *Science (New York, NY)* *304*, 1506-1509.

633 Van der Geize, R., Yam, K., Heuser, T., Wilbrink, M.H., Hara, H., Anderton, M.C., Sim, E.,  
634 Dijkhuizen, L., Davies, J.E., Mohn, W.W., *et al.* (2007). A gene cluster encoding cholesterol  
635 catabolism in a soil actinomycete provides insight into *Mycobacterium tuberculosis* survival  
636 in macrophages. *Proceedings of the National Academy of Sciences* *104*, 1947-1952.

637 VanderVen, B.C., Fahey, R.J., Lee, W., Liu, Y., Abramovitch, R.B., Memmott, C., Crowe, A.M., Eltis,  
638 L.D., Perola, E., Deininger, D.D., *et al.* (2015). Novel inhibitors of cholesterol degradation in  
639 *Mycobacterium tuberculosis* reveal how the bacterium's metabolism is constrained by the  
640 intracellular environment. *PLoS pathogens* *11*, e1004679.

641 Yam, K.C., D'Angelo, I., Kalscheuer, R., Zhu, H., Wang, J.-X., Snieckus, V., Ly, L.H., Converse, P.J.,  
642 Jacobs, W.R., Jr., Strynadka, N., *et al.* (2009). Studies of a Ring-Cleaving Dioxygenase Illuminate  
643 the Role of Cholesterol Metabolism in the Pathogenesis of *Mycobacterium tuberculosis*. *PLoS*  
644 *pathogens* *5*, e1000344.

645 Yang, X., Nesbitt, N.M., Dubnau, E., Smith, I., and Sampson, N.S. (2009). Cholesterol metabolism  
646 increases the metabolic pool of propionate in *Mycobacterium tuberculosis*. *Biochemistry* *48*,  
647 3819-3821.

648  
649  
650  
651  
652  
653  
654  
655  
656  
657  
658  
659  
660

661

662

663 **Figure 1. LucA facilitates cholesterol uptake in Mtb.**

664 (A) Expressing wild type *lucA* restores the cholesterol-dependent toxicity phenotype and  
665 prevents growth of the  $\Delta icl1$  Tn::*lucA* mutant in cholesterol media.

666 (B) The  $\Delta lucA$  and  $\Delta yrbE4A$  mutants are defective in cholesterol metabolism. The  
667 catabolic release of  $^{14}\text{CO}_2$  from [4- $^{14}\text{C}$ ]-cholesterol was quantified over 5 hours for each  
668 strain. The amount of  $^{14}\text{CO}_2$  released by wild type was set to 100% and the amount of  
669  $^{14}\text{CO}_2$  released by the other strains was expressed as a ratio relative to wild type.

670 (C) The  $\Delta lucA$  and  $\Delta yrbE4A$  mutants are defective in cholesterol uptake. Mtb associated  
671 cholesterol was quantified using [4- $^{14}\text{C}$ ]-cholesterol over 2 hours. The rate of uptake was  
672 determined using linear regression (Figure S5 and Table S2). The cholesterol uptake rate  
673 in wild type was set to 100% and the uptake rates for the other strains were expressed as  
674 a ratio relative to wild type.

675 (B and C) Data are means  $\pm$  SD (n = 4).

676 \*p < 0.0005, \*\*p < 0.005, \*\*\*p < 0.05 (Student's t test).

677

678 **Figure 2. Transcriptional profile of the  $\Delta lucA$  mutant during infection in MΦs**

679 Bacterial gene expression profiles were determined at day 3-post infection in resting  
680 murine bone marrow-derived MΦs. Gene expression values from the  $\Delta lucA$  mutant ( $\Delta$ )  
681 and complement (C) strains were normalized to wild type. Genes in the KstR regulon are  
682 described (Kendall et al., 2007), and the fatty acid induced genes are up-regulated >2.5-  
683 fold in response to palmitate and >1.4-fold in MΦs (Schnappinger et al., 2003). Data are  
684 means (n = 3) and the absolute values and statistical analysis are shown in (Tables S3,  
685 S4, and S5).

686

687 **Figure 3. LucA facilitates fatty acid uptake during infection and in axenic culture.**

688 (A) The  $\Delta lucA$  mutant does not accumulate Bodipy-C16 in cytosolic lipid inclusions  
689 compared to wild type and the complemented strain. Representative confocal images of  
690 infected resting murine MΦs pulse labeled with Bodipy-C16 (red = mCherry Mtb, green =  
691 Bodipy-C16). Scale bar 5.0  $\mu\text{m}$ .

692 (B) Flow cytometry based quantification of Bodipy-C16 incorporation by Mtb isolated from  
693 pulse labeled MΦs. Shaded histogram represents the Mtb auto-fluorescence in the green  
694 channel. 100,000 events from each strain were analyzed.

695 (C) Transmission electron microscopy reveals a lack of intracellular Li's in the  $\Delta lucA$   
696 mutant at day 3-post infection in MΦs. Li's indicated by asterisks are readily apparent in  
697 wild type and the complemented strain but not in the  $\Delta lucA$  mutant. Scale bar 0.5 μm.

698 (D) Quantification of intracellular Mtb containing visible Li's per macrophage section.  
699 Horizontal bars are means ± SD (n = 20).

700 (E, G) The  $\Delta lucA$  and  $\Delta yrbE1A$  mutants are defective in fatty acid metabolism. The  
701 catabolic release of  $^{14}\text{CO}_2$  from [ $^{14}\text{C}(\text{U})$ ]-palmitic acid (E) or [ $1\text{-}^{14}\text{C}$ ]-oleic acid (G) was  
702 quantified over 5 hours for each strain.

703 (F, H) The  $\Delta lucA$  and  $\Delta yrbE1A$  mutants are defective in fatty acid uptake. Mtb associated  
704 fatty acids were quantified using [ $^{14}\text{C}(\text{U})$ ]-palmitic acid (F) or [ $1\text{-}^{14}\text{C}$ ]-oleic acid (H) over 2  
705 hours for each strain.

706 (E-H) Data was calculated as in Figure 1B and C. Data are means ± SD (n ≥ 4).

707 \*p < 0.0005, \*\*p < 0.0001, \*\*\*p < 0.005 (Student's t test).

708

709 **Figure 4. LucA interacts with subunits of Mce1 and Mce4 transporters and is**  
710 **required for their stability.**

711 (A) Schematic of proteins tested for interaction with LucA. Top, schematic of protein  
712 fusions with DHFR domains. Bottom, putative accessory subunits of Mce transporters  
713 homologous to Mam4B. Shading indicates proteins tested positive for interaction with  
714 LucA. Striped boxes indicate predicted transmembrane domains.

715 (B) Two-hybrid assay for the detected interactions between LucA and accessory proteins  
716 of Mce1 and Mce4. Serial dilutions of Msm co-expressing the LucA-F<sub>3</sub> bait and the  
717 indicated prey were spotted onto an agar plate without antibiotic or onto plates containing  
718 trimethoprim at the indicated concentration. Growth on trimethoprim plates is indicative of  
719 protein-protein interaction. Details prey proteins see (Table S6). Positive: Msm co-  
720 expressing *Saccharomyces cerevisiae* homodimeric leucine zipper subunits (GCN4-F<sub>1,2</sub>  
721 and GCN4-F<sub>3</sub>). Negative: Msm expressing LucA-F<sub>3</sub> and GCN4-F<sub>1,2</sub>.

722 (C) Genome organization of Mce1 and Mce4 subunits. Striped arrows indicate genes  
723 encoding proteins tested for stability in  $\Delta lucA$ . Empty arrows indicate genes encoding  
724 accessory proteins that interact with LucA.

725 (D) Subunits of the Mce1 and Mce4 complexes are degraded in the  $\Delta lucA$  mutant. Whole  
726 cell lysates were prepared from wild type,  $\Delta lucA$ , and the complement strain. The indicated  
727 proteins were analyzed separately by SDS-PAGE and western blotting. Chloramphenicol  
728 was added for 2 days before protein extraction where indicated. The levels of MceG were

729 quantified and expressed as a ratio relative to levels of MceG in the wild type lysates.  
730 GroEL2 is used as a loading control and blots are representative of two independent  
731 experiments.

732

733 **Figure 5. LucA is required for the full fitness of Mtb in MΦs and survival in mouse**  
734 **lungs.**

735 (A) Bacterial replication in resting human monocyte derived MΦs. Data are means ± SD (n  
736 = 3).

737 (B) Bacterial replication in resting murine bone marrow derived MΦs. Data are means ±  
738 SD (n = 3).

739 (C) Bacterial survival in mouse lung tissues. Data are means ± SD (n = 5 per time point)

740 (D) Lung pathology of infected mice collected at indicated time points and H&E stained.

741 Scale bar 400 μm.

742 \*p < 0.05, \*\*p < 0.005, \*\*\*p < 0.001, \*\*\*\*p < 0.0005 (Student's t test).

743

## 744 **Materials and Methods**

### 745 **Bacteria and growth conditions**

746 *M. tuberculosis* strains were routinely grown at 37°C in 7H9 (broth) or 7H11 (agar) media  
747 supplemented with OAD enrichment (oleate-albumin-dextrose-NaCl), 0.05% glycerol and  
748 0.05% tyloxapol (broth). AD enrichment consisted of fatty acid free albumin-dextrose-NaCl.  
749 7H9-based minimal medium is composed of Difco Middlebrook 7H9 powder 4.7 g/liter, 100  
750 mM 2-(*N*-morpholino)ethanesulfonic acid pH 6.6, and carbon sources as indicated.  
751 Cholesterol was added to the liquid and solid media as tyloxapol:ethanol micelles as  
752 described (Lee et al., 2013). Hygromycin 100 µg/ml, kanamycin 25 µg/ml, streptomycin 50  
753 µg/ml, and apramycin 50 µg/ml were used for selection. For *E. coli* selection hygromycin  
754 was used at 150 µg/ml.

### 755 **Transposon screen and strain construction**

756 A library of transposon mutants ( $\sim 10^5$ ) in a *Δicl1* deficient strain of Mtb described by (Lee  
757 et al., 2013) was plated onto 7H11 OAD agar containing 100 µM cholesterol. Individual  
758 mutants were recovered in culture. Chromosomal DNA was isolated and the transposon  
759 insertion sites were PCR amplified and sequenced according to (Prod'homme et al., 1998).  
760 Mutant strains of Mtb were generated by allelic exchange (Mann et al., 2011) using a  
761 hygromycin resistance cassette mutant. Allelic exchange was confirmed by sequencing  
762 and/or Southern analysis using the Direct nucleic acid labeling and detection kit, GE  
763 Health Care. All the strains used in the study are summarized (Table S5).

### 764 **Radiorespirometry assays**

765 Lipid oxidation was monitored by quantifying the release of  $^{14}\text{CO}_2$  from [4- $^{14}\text{C}$ ]-cholesterol,  
766 [ $^{14}\text{C}$ (U)]-palmitate, and [1- $^{14}\text{C}$ ]-oleate by radiorespirometry as described (VanderVen et al.,  
767 2015). Briefly, Mtb cultures were pre-grown in 7H9 AD for 5 days, then incubated at OD<sub>600</sub>  
768 of 0.7 in 5 ml 7H9 AD (albumin-dextrose-NaCl) medium supplemented with 1.0 µCi of  
769 radiolabeled substrates in vented standing T-25 tissue culture flasks. The culture flasks

770 were placed in an air-tight vessel with an open vial containing 0.5 ml 1.0 M NaOH, sealed,  
771 and incubated at 37°C. After 5 hours, the NaOH vial was recovered, neutralized with 0.5  
772 ml 1.0 M HCl, and the amount of base soluble Na<sub>2</sub><sup>14</sup>CO<sub>3</sub> was quantified by scintillation  
773 counting. The radioactive signal was normalized to the relative levels of bacterial growth by  
774 determining the OD<sub>600</sub> for the bacterial cultures. % CO<sub>2</sub> release was expressed as a ratio  
775 of normalized radioactive signal for each strain relative to the wild type control.

#### 776 **Lipid uptake assays**

777 Lipid uptake was quantified as described previously (Forrellad et al., 2014; Pandey and  
778 Sasseti, 2008) with slight modifications. Briefly, Mtb was cultured at an initial OD<sub>600</sub> of 0.1  
779 in 7H9 AD medium in vented standing T-75 tissue culture flasks. After 5 days, cultures  
780 were all normalized to OD<sub>600</sub> of 0.7 in 8ml using spent medium, and 0.2 µCi of radiolabeled  
781 substrates was added to the cultures. After 5, 30, 60 and 120 min of incubation at 37°C 1.5  
782 ml of the bacterial cultures were collected by centrifugation. Each bacterial pellet was  
783 washed thrice in 1 ml of ice-cold wash buffer (0.1% Fatty acid free-BSA and 0.1% Triton X-  
784 100 in PBS), fixed in 0.2 ml of 4% PFA for 1h. The total amount of radioactive label  
785 associated with the fixed pellet was quantified by scintillation counting. The radioactive  
786 signal was normalized to the relative levels of bacterial growth, i.e. to the OD<sub>600</sub> of the  
787 bacterial cultures before addition of radioactive label. The uptake rate was calculated by  
788 applying linear regression to the normalized radioactive counts over time, and uptake  
789 efficiency was expressed as a ratio of uptake rate for each strain relative to the wild type  
790 control.

#### 791 **MΦs isolation and culturing**

792 MΦs were differentiated using bone marrow cells from BALB/c mice (Jackson  
793 Laboratories, USA) and maintained in DMEM supplemented with 10% heat inactivated  
794 fetal calf serum, 2.0 mM L-glutamine, 1.0 mM sodium pyruvate, 10% L-cell-conditioned  
795 media and antibiotics (100 U/ml penicillin and 100 mg/ml streptomycin) at 37°C and 7.0%

796 CO<sub>2</sub> for 10 days before infection. Human MΦs were differentiated from purified human  
797 peripheral blood mononuclear cells obtained from Elutriation Core Facility, University of  
798 Nebraska Medical Center and maintained in DMEM supplemented with 10% pooled heat  
799 inactivated human serum (SeraCare), 2.0 mM L-glutamine, 1.0 mM sodium pyruvate and  
800 antibiotics (100 U/ml penicillin and 100 mg/ml streptomycin) at 37°C and 7.0% CO<sub>2</sub> for 7  
801 days before infection. Media without antibiotics was used for infections with Mtb.

## 802 **Transcriptional profiling**

803 Murine bone marrow-derived MΦs were seeded into two T-75 tissue culture flasks  
804 ( $1.5 \times 10^7$  cells per flask) and infected with Mtb at a MOI of 4:1 for 3 days. Bacterial RNA  
805 was isolated, amplified, dye labeled, and hybridized to the microarray as described (Liu et  
806 al., 2016; Rohde et al., 2007). All transcriptional profile data has been deposited in the  
807 Gene Expression Omnibus database, accession number XXXX. The entire dataset is also  
808 available on ArrayExpress database ([www.ebi.ac.uk/arrayexpress/](http://www.ebi.ac.uk/arrayexpress/)), accession number  
809 XXXX.

## 810 ***prpD'*::GFP reporter assays**

811 The promoter of *rv1130/prpD* was fused to GFP in a replicating vector that constitutively  
812 expresses mCherry (Table S7) To detect *prpD* promoter activity bacteria were grown in  
813 7H9-based minimal medium containing 10 mM glucose for 5 days, washed twice with PBS  
814 0.05% tyloxapol, and passed to medium containing 100 μM cholesterol or propionate at  
815 the indicated concentration for 24 hr. The bacteria were fixed with 4% paraformaldehyde  
816 (PFA) and GFP expression was quantified by flow cytometry on a BD Biosciences *LSR II*  
817 flow cytometer. To detect *prpD* promoter activity during infection bacteria grown 7H9-  
818 based minimal medium containing 10 mM glucose were used to infect murine MΦs at an  
819 MOI of 5:1. After 24 hr infection the MΦs were fixed with 4% PFA and scraped into 10 ml  
820 of PBS and suspended 1 ml of lysis buffer (0.1% SDS, 0.1 mg/ml Proteinase K in H<sub>2</sub>O).  
821 MΦs were lysed by 25 passages through a 25-gauge needle and the bacteria containing



822 cell lysate was centrifuged and the pellet was retained and analyzed on a BD Biosciences  
823 *LSR II* flow cytometer. Flow cytometry data was analyzed using FlowJo (Tree Star, Inc).

#### 824 **Imaging of intracellular lipid inclusions**

825 Confluent monolayers of MΦs in Ibidi eight-well glass-bottom chambers were infected with  
826 bacteria at a MOI of 4:1. Extracellular bacteria were removed after 4 hours of infection.  
827 Infected MΦs were maintained in cell culture medium at 37°C and 7% CO<sub>2</sub> for 3 days.  
828 Lipid inclusions of bacteria in MΦs were metabolically labeled with Bodipy-C16 (final  
829 concentration 20 μM) conjugated to 1.0% de-fatted bovine serum albumin (BSA) for a 30  
830 minute pulse followed by a 1 hour chase with fresh media. Live-cell images were acquired  
831 as described (Podinovskaia et al., 2013). For lipid staining, MΦs were transferred onto  
832 sterile coverslips in 24-well plates, infected with Mtb for 3 days and fixed in 4% PFA  
833 followed by staining with BODIPY-493/503 (1.0 μg/ml, at room temperature for 1 hour).  
834 Post-acquisition, images were analyzed using Volocity (PerkinElmer Life Sciences).

#### 835 **Flow cytometric quantification of assimilated lipids**

836 Murine bone marrow-derived MΦs were seeded into T-150 tissue culture flasks ( $3 \times 10^7$   
837 cells per flask) and infected with Mtb at a MOI of 4:1. After 3 days of infection Bodipy-  
838 palmitate (final concentration 8 μM) conjugated to de-fatted 1% BSA was added to the  
839 cells for 1 hour pulse and then chased with cell media for another hour. The infected MΦs  
840 were scraped into 15 ml of homogenization buffer (250 mM sucrose, 0.5 mM EGTA, 20  
841 mM HEPES, .05% gelatin, pH 7.0) and pelleted by centrifugation at 514xG (1,500 rpm,  
842 Beckman Allegra 6KR centrifuge, GH-3.8 rotor), followed by cell lysis by 70 passages  
843 through a 25 gauge needle. 5 ml of cell lysate was centrifuged at 146xG (800 rpm) for 10  
844 minutes, supernatant (suspensions of phagosomes) was retained and treated with 0.1%  
845 Tween-80 at 4°C for 15 minutes to break-open Mtb containing vacuoles. Isolated bacteria  
846 were washed once in PBS+0.05% tyloxapol and fixed in 4% PFA. Flow cytometry data  
847 was collected on BD FACS LSR II and analyzed using FlowJo (Tree Star, Inc).

## 848 **Colocalization studies with Alexa647-dextran labeled lysosomes**

849 At day 3 of infection, bone marrow derived MΦs were pulse labeled with 50 µg/ml  
850 Alexa647-dextran for 45 minutes and chased in fresh media for an additional 45 minutes.  
851 Following the chase period the infected cells were fixed and imaged by confocal  
852 microscopy. An extended focus merge of the two channels and the background was used  
853 to threshold the data as described (Costes et al., 2004) and colocalization was calculated  
854 using Volocity (PerkinElmer Life Sciences).

## 855 **Transmission electron microscopy**

856 Imaging was conducted as described (Podinovskaia et al., 2013).

## 857 **Tetrahydrolipostatin treatment of infected MΦs**

858 Infected bone marrow derived MΦs were treated with 100 µM tetrahydrolipostatin at 4  
859 hours post infection and maintained in the medium throughout the infection. Infected cells  
860 were fixed at day 3, stained with Bodipy-493/503, and imaged by confocal microscopy.

## 861 **Protein fragment complementation screen**

862 Library construction and the screen were performed as described (Singh et al., 2006).  
863 Briefly, Mtb genomic DNA was isolated and partially digested with Acil and HpaII, size  
864 fractionated (0.5-2 kb), and cloned into the ClaI site of pUAB300 upstream of the F<sub>1,2</sub>  
865 domain of murine dihydrofolate reductase. *E. coli* MegaX™ DH10B™ T1 (Life  
866 Technologies) electrocompetent cells were used for transformation. In total 5x10<sup>5</sup>  
867 independent clones were selected on LB hygromycin agar plates. The clone library was  
868 isolated by QIAGEN QIAfilter Plasmid Giga Kit and used to transform Msm mc<sup>2</sup>155  
869 containing pUAB200 which co-expresses the bait protein LucA protein fused to the F<sub>3</sub>  
870 (LucA-F<sub>3</sub>) domain of murine dihydrofolate reductase. In total 2x10<sup>6</sup> clones were screened  
871 on plates containing trimethoprim 30 µg/ml. Clones containing fragments of the Mtb  
872 dihydrofolate reductase (*rv2763c/dfrA*) were identified by PCR and removed (85.8%).

873 Inserts from the *dfrA*-negative clones were sequenced, and the only in-frame clone that  
874 was identified more than once (4 times) contained first 225 bp of *rv3492c/mam4B*.

### 875 **Spotting two-hybrid interaction assay**

876 All Msm clones expressing the bait and prey constructs used for interaction assays are  
877 shown (Table S6). Msm was grown in modified 7H9-OAD media containing 2% glycerol,  
878 0.5% additional glucose and 0.05% Tween-80 shaking at 37°C. Bacteria were diluted to  
879  $\sim 8.3 \times 10^6$  bacteria/ml and grown 5 hours before diluting to  $\sim 1 \times 10^6$  bacteria/ml. Bacteria  
880 were diluted further to spot onto agar plates containing trimethoprim at 0, 15, and 30  
881  $\mu\text{g/mL}$ .

### 882 **Quantification of protein interactions**

883 To quantify the strength of interactions we used an AlamarBlue based approach modified  
884 from (Singh et al., 2006). Briefly, log-phase cultures of Msm clones were transferred into  
885 96-well microtiter plates at a density of  $10^6$  of cells per well. Eight 2-fold serial dilutions of  
886 trimethoprim were made for each clone, from 600 to 4.69  $\mu\text{g/ml}$ . The final volume in the  
887 wells was 200  $\mu\text{l}$ . After 41 hours of incubation at 37°C, 30  $\mu\text{l}$  50% AlamarBlue (Life  
888 Technologies) (diluted with the media) was added to the wells and after incubating for 20  
889 hours the fluorescence intensity was measured in Gemini EM Microplate Reader  
890 (Molecular Devices) with excitation at 530nm and emission at 590nm. 100% inhibition was  
891 assigned to the wells without cells, and 0% inhibition to the wells with cells without  
892 trimethoprim.

### 893 **Antibody generation and western analysis**

894 Antibody for MceG was generated in rabbits using the peptide KAQAAILDDL conjugated to  
895 keyhole limpet hemocyanin by (Cocalico Biologicals). This peptide was used for antibody  
896 purification by immunoaffinity chromatography. For westerns bacteria were grown as for  
897 the lipid uptake assays. In the cases of chloramphenicol treatment, the antibiotic was  
898 added at 20  $\mu\text{g/ml}$  2 days prior to harvesting the bacteria. To generate lysates bacteria

899 were washed twice with PBS 0.05% tyloxapol and fixed with 4% PFA for 1 hour. Fixed  
900 cells were washed twice in PBS 0.05% tyloxapol and lysed by sonication. Protein  
901 concentrations were determined by BCA (Thermo Fisher Scientific) and equivalent  
902 amounts of protein were resolved by SDS-PAGE and transferred to nitrocellulose  
903 membranes. The primary anti-Mce1A, anti-Mce1D and, anti-Mce1E antibodies were  
904 obtained from Christopher Sasseti (Feltcher et al., 2015), and the anti-GroEL *antibody*  
905 *was obtained from BEI resources*. A HRP-conjugated goat-anti rabbit IgG (Jackson  
906 ImmunoResearch) was used as the secondary antibody. ImageJ was used to quantify  
907 signals on Western blots.

#### 908 **qPCR**

909 Bacteria were cultured as described for western analysis and the RNA was extracted and  
910 analyzed as previously described (Abramovitch et al., 2011).

#### 911 **Bacterial survival assay in MΦs**

912 Confluent macrophage (human and murine) monolayers in 24-well dishes were infected  
913 with Mtb at a MOI 4:1 for murine cells and a MOI of 0.5:1 for the human cells. Extracellular  
914 bacteria were removed by washing with fresh media after 4 hours of infection. At indicated  
915 time points MΦs were lysed with 0.1% Tween-80 in water and the lysates were serially  
916 diluted in 0.05% Tween-80 in water. The lysates were plated on 7H11 OAD agar and CFU  
917 were quantified after 3-4 weeks incubation at 37°C.

#### 918 **Mouse infections**

919 Eight-week-old female C57BL/6J WT mice (Jackson Laboratories) were infected with  
920 1,000 CFU of Mtb Erdman (wild type,  $\Delta lucA$ , complement) via an intranasal delivery  
921 method as described (Sukumar et al., 2014). This was accomplished by lightly  
922 anesthetizing the mice with isoflurane and administering the bacteria in a 25  $\mu$ l volume  
923 onto both nares. At sacrifice, the lungs were removed and half of the lungs were fixed in  
924 4% PFA overnight, while another half was used for bacterial load quantification. For the

925 latter, lungs were homogenized in PBS 0.05% Tween-80 and plated on 7H11 OAD agar.

926 CFU were quantified after 3-4 weeks incubation at 37°C.

927 **Lung histopathology**

928 PFA fixed lung lobes were stained with hematoxylin and eosin by the Cornell Histology

929 Laboratory. Stained sections were imaged using a Zeiss Axio Imager M1 equipped with an

930 AxioCam Hrc camera.

931 **Ethics Statement.** All animal care and experimental protocols were in accordance with the

932 NIH “Guide for the Care and Use of the laboratory Animals” and were approved by the

933 Institutional Animal Care and Use Committee of Cornell University (protocol number 2013-

934 0030).

935

936

937

938

939 **Figure S1. Mutations in cholesterol assimilation genes relieve cholesterol toxicity in**  
940 ***Δicl1* Mtb.**

941 (A) Schematic detailing the source of cholesterol dependent toxicity in *Δicl1* Mtb.

942 (B) Transposon insertions rescue growth of *Δicl1* Mtb. Representative clones carrying  
943 transposon insertions in the indicated genes in the *Δicl1* background rescue bacterial  
944 growth in 7H9 OAD media supplemented with 100 μM cholesterol. Data are representative  
945 of two independent experiments.

946

947 **Figure S2. LucA-GFP has a cell surface localization pattern.**

948 Wild type Mtb constitutively expressing mCherry and LucA-GFP. Left panel a z-slice in the  
949 green channel alone (green = LucA-GFP) and the right panel overlaid green and red  
950 channels (red = mCherry M.tb) for the same optical slice. Scale bar 1.0 μm

951

952 **Figure S3. Confirmation of the *ΔlucA* mutant**

953 Genomic DNA from Mtb was digested with PvuI and analyzed by Southern blotting using  
954 the indicated probe. Allelic exchange removes an internal fragment of *rv3723/lucA*  
955 containing a PvuI restriction site.

956

957 **Figure S4. The *ΔlucA* mutant has no growth defect in 7H9 AD media.**

958 Bacterial growth was monitored across 20 days in 7H9 AD media. Data are means ± SD (n  
959 = 3)

960

961 **Figure S5. Raw radioactive counts and calculated lipid uptake rates**

962 Raw counts from the cholesterol (A), palmitic acid (B), and oleic acid (C) uptake assays.  
963 Right, examples of how rate was calculated by applying linear regression to the cell-  
964 associated radioactivity counts. The slopes were used for quantification of the uptake  
965 efficiency. Data shown is representative of one independent experiment with two biological  
966 replicates. R<sup>2</sup> indicates fit of linear regression.

967

968 **Figure S6. The *ΔlucA* mutant has defect in *prpD* gene expression.**

969 (A and B) Wild type Mtb carrying the *prpD* promoter reporter (*prpD*::GFP *smyc*::mCherry)  
970 expresses GFP in media containing cholesterol (100 μM) or propionate (300 μM). GFP  
971 signal was quantified by flow cytometry from 10,000 events. (B) The median GFP signal  
972 from wild type grown in cholesterol media was set to 100% and the GFP signals for

973 bacteria grown in glucose and propionate was expressed as a ratio relative to the GFP  
974 signal from cholesterol media.

975 (C) The  $\Delta lucA$  mutant carrying the *prpD* promoter reporter has a defect in GFP expression  
976 when grown in cholesterol-containing media. WT was used as 100% to compare to the  
977 other strains.

978 (D) The  $\Delta lucA$  mutant carrying the *prpD* promoter reporter has a defect in GFP expression  
979 during infection of resting bone marrow derived MΦs. Bacteria expressing PrpD::GFP  
980 were isolated from macrophages after day 1-post infection and analyzed by flow  
981 cytometry. WT was used as 100% to compare to the other strains.

982 (B-D) Data are means  $\pm$  SD (n=3).

983 \*p <  $1 \times 10^{-6}$ , \*\*p <  $5 \times 10^{-6}$ , \*\*\*p <  $5 \times 10^{-8}$  (Student's t test).

984

985 **Figure S7. There is no defect in survival of  $\Delta lucA$  mutant in MΦs at day 3 of**  
986 **infection.**

987 Bacterial viability determined at day 3-post infection from resting murine MΦs. Data are  
988 means  $\pm$  SD (n = 3).

989

990 **Figure S8. The  $\Delta lucA$  mutant does not colocalize with pulse labeled lysosomes.**

991 Three-dimensional reconstructions of infected MΦs pulse-labeled with Alexa647-dextran  
992 (green = Alexa647-labeled) and (red = mCherry Mtb).

993

994 **Figure S9. The  $\Delta lucA$  mutant does not accumulate intracellular lipid inclusions that**  
995 **can be stained with Bodipy-493/503.**

996 (A) Infected bone marrow derived MΦs were fixed at day 3, stained with Bodipy-493/503,  
997 and imaged by confocal microscopy. Analysis of z-slices demonstrates that both wild type  
998 and the complemented mutant form intracellular lipid inclusions indicated by the punctate  
999 intracellular staining within the bacteria (red = mCherry Mtb) and (green = Bodipy-  
1000 493/503), while  $\Delta lucA$  mutant does not. Scale bar, 5.0  $\mu$ m.

1001 (B) THL treatment does not alter levels of intracellular lipid inclusions in the  $\Delta lucA$  mutant.  
1002 Analysis of z-slices from treated cells demonstrates that wild type labels positive for  
1003 intracellular lipid inclusions and the mutant does not. Lipid inclusions are identified by the  
1004 punctate intracellular staining with Bodipy-493/503 within the bacteria (red = mCherry Mtb)  
1005 and (green = Bodipy-493/503).

1006

1007 **Figure S10. YrbE1A is not required for cholesterol assimilation in Mtb.**

1008 (A and B) The  $\Delta yrbE1A$  mutant has no defect in of cholesterol uptake (A) and metabolism  
1009 (B).Data was calculated as in Figure 1B and 1C. Data are means  $\pm$  SD (n  $\geq$  4).

1010  
1011 **Figure S11. Deletion of the full Mce1 operon leads to fatty acid uptake defect.**

1012 (A and D) The  $\Delta mce1$  has no defect in cholesterol uptake (A) and metabolism (D). Data  
1013 was calculated as in Figure 1B and 1C.

1014 (B and E) The  $\Delta mce1$  is defective in oleic acid uptake (B) and metabolism (E). Data was  
1015 calculated as in Figure 3E-H.

1016 (C and F) The  $\Delta mce1$  is defective in palmitic acid uptake (C) and metabolism (F). Data  
1017 was calculated as in Figure 3E-H.

1018 Data are means  $\pm$  SD (n  $\geq$  4).

1019 \*p < 0.0001 (Student's t test).

1020  
1021 **Figure S12. Deletion of LucA does not alter transcription levels of Mce1 and MceG.**

1022 qPCR was performed using RNA isolated from Mtb. Fold change values were determined  
1023 by normalizing transcript levels to the Mtb housekeeping gene, sigA. Data are means  $\pm$  SD  
1024 (n = 6)

1025  
1026 **Figure S13. Mas4B is required for cholesterol assimilation.**

1027 (A) The  $\Delta mas4B$  mutant is capable of cholesterol uptake. Data are means  $\pm$  SD (n = 4).  
1028 Data was calculated as in in ure 1C.

1029 (B) The  $\Delta mas4B$  mutant is defective in cholesterol metabolism. Data are means  $\pm$  SD (n  $\geq$   
1030 4). Data was calculated as in Figure 1B and 1C.

1031 (C-D) The  $\Delta mas4B$  mutant has no defect in oleic acid uptake (C) or metabolism (D). Data  
1032 are means  $\pm$  SD (n = 4).

1033 (E-F) The  $\Delta mas4B$  mutant has no defect in palmitic acid uptake (E) or metabolism (F).  
1034 Data are means  $\pm$  SD (n = 4).

1035 (C-F) Data was calculated as in Figure 3E-H.

1036 \*p < 0.0001 (Student's t test).

1037  
1038 **Figure S14. Hypothetical model for Mce-mediated transport of lipid nutrients into**  
1039 **Mtb**



1040 (A) Proposed spatial arrangement and function for components of the Mce transporters.  
1041 The secreted proteins (MceA-F) likely participate in the binding and shuttling of lipid  
1042 nutrient across the mycolic acid layer and “pseudo-periplasmic space” of the Mtb cell wall,  
1043 indicated as Step 1. These binding and shuttling events deliver the nutrient to specific  
1044 cytoplasmic membrane proteins. The cytoplasmic membrane proteins function to  
1045 translocate nutrients across the membrane indicated as Step 2. The permease subunits  
1046 likely serve as the substrate pore and the accessory subunits likely act as an adapter to  
1047 recruit additional proteins to the complex such as MceG and LucA which potentially  
1048 regulate activity/stability of the transport complex. LucA likely interacts with and protects  
1049 the Mce complexes from proteolytic degradation from an unknown protease indicated as  
1050 Step 3.

1051 (B) Depiction of genome organization for known and predicted subunits involved in Mce1  
1052 and Mce4 mediated translocation of fatty acids and cholesterol respectively.

1053

#### 1054 **Table S1. Mutants identified with the rescue screen in $\Delta ic1$ Mtb**

1055 The disrupted gene is denoted along with the corresponding function for the mutated gene.  
1056 The number of mutants indicates the total number of mutant clones identified and  
1057 parentheses denote the number of independent insertions identified in the specific allele.  
1058 Mutants indicated in red are predicted to be required for Mtb growth on cholesterol as a  
1059 sole carbon source (Griffin et al., 2011).

1060

#### 1061 **Table S2. Uptake rate calculations**

1062 Cholesterol, palmitic acid or oleic acid uptake was quantified during incubation of Mtb with  
1063 tracer levels of radiolabeled substrates for 2 hours. Linear regression was applied to the  
1064 cell-associated radioactivity counts over time to quantify uptake rates. These uptake rates  
1065 determined as the slopes were used for quantification of the uptake efficiency. Data is  
1066 representative of one of the independent experiments with two biological replicates.  $R^2$   
1067 indicates fitness of linear regression.

1068

#### 1069 **Table S3. Full bacterial transcriptional responses at day 3-post infection in murine 1070 bone marrow-derived MΦs**

1071

#### 1072 **Table S4. Cholesterol-specific transcriptional response at day 3-post infection in 1073 murine bone marrow-derived MΦs**

1074

1075 **Table S5. Fatty acid-specific transcriptional response at day 3-post infection in**  
1076 **murine bone marrow-derived MΦs**

1077

1078 **Table S6. Protein interactions constructs**

1079

1080 **Table S7. List of strains used in this study**

1081

1082

1083

1084

1085

1086

1087

1088

1089

1090

1091

1092

1093

1094

1095

1096

1097

1098

1099

1100
